# Supplementary material
Source: PubMed Central journal article supplement (PMC6321762)
Supplement: NIHMS80906-supplement-Supplementary_Materials.pdf [file NIHMS80906-supplement-Supplementary_Materials.pdf]

## Supplementary Materials

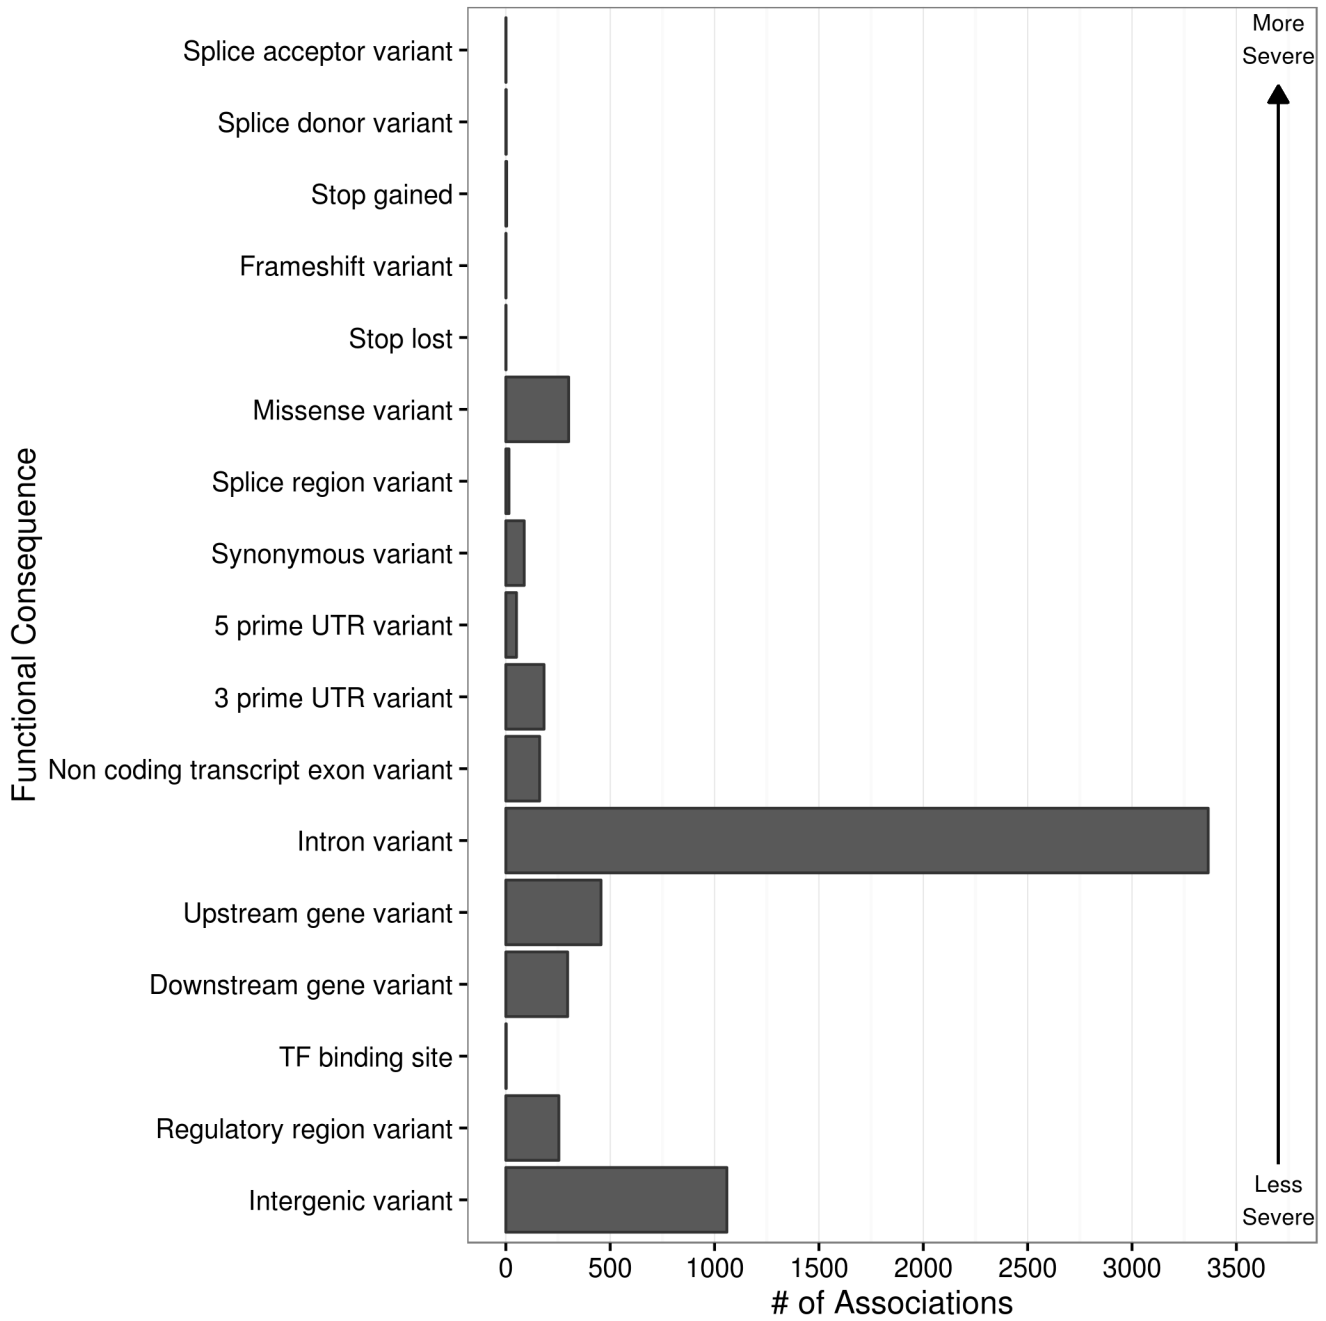

**Fig. S1.** The distribution of Sequence Ontology functional consequences of GWAS significant variant associations (p-value  $\leq 5 \times 10^{-8}$ ).

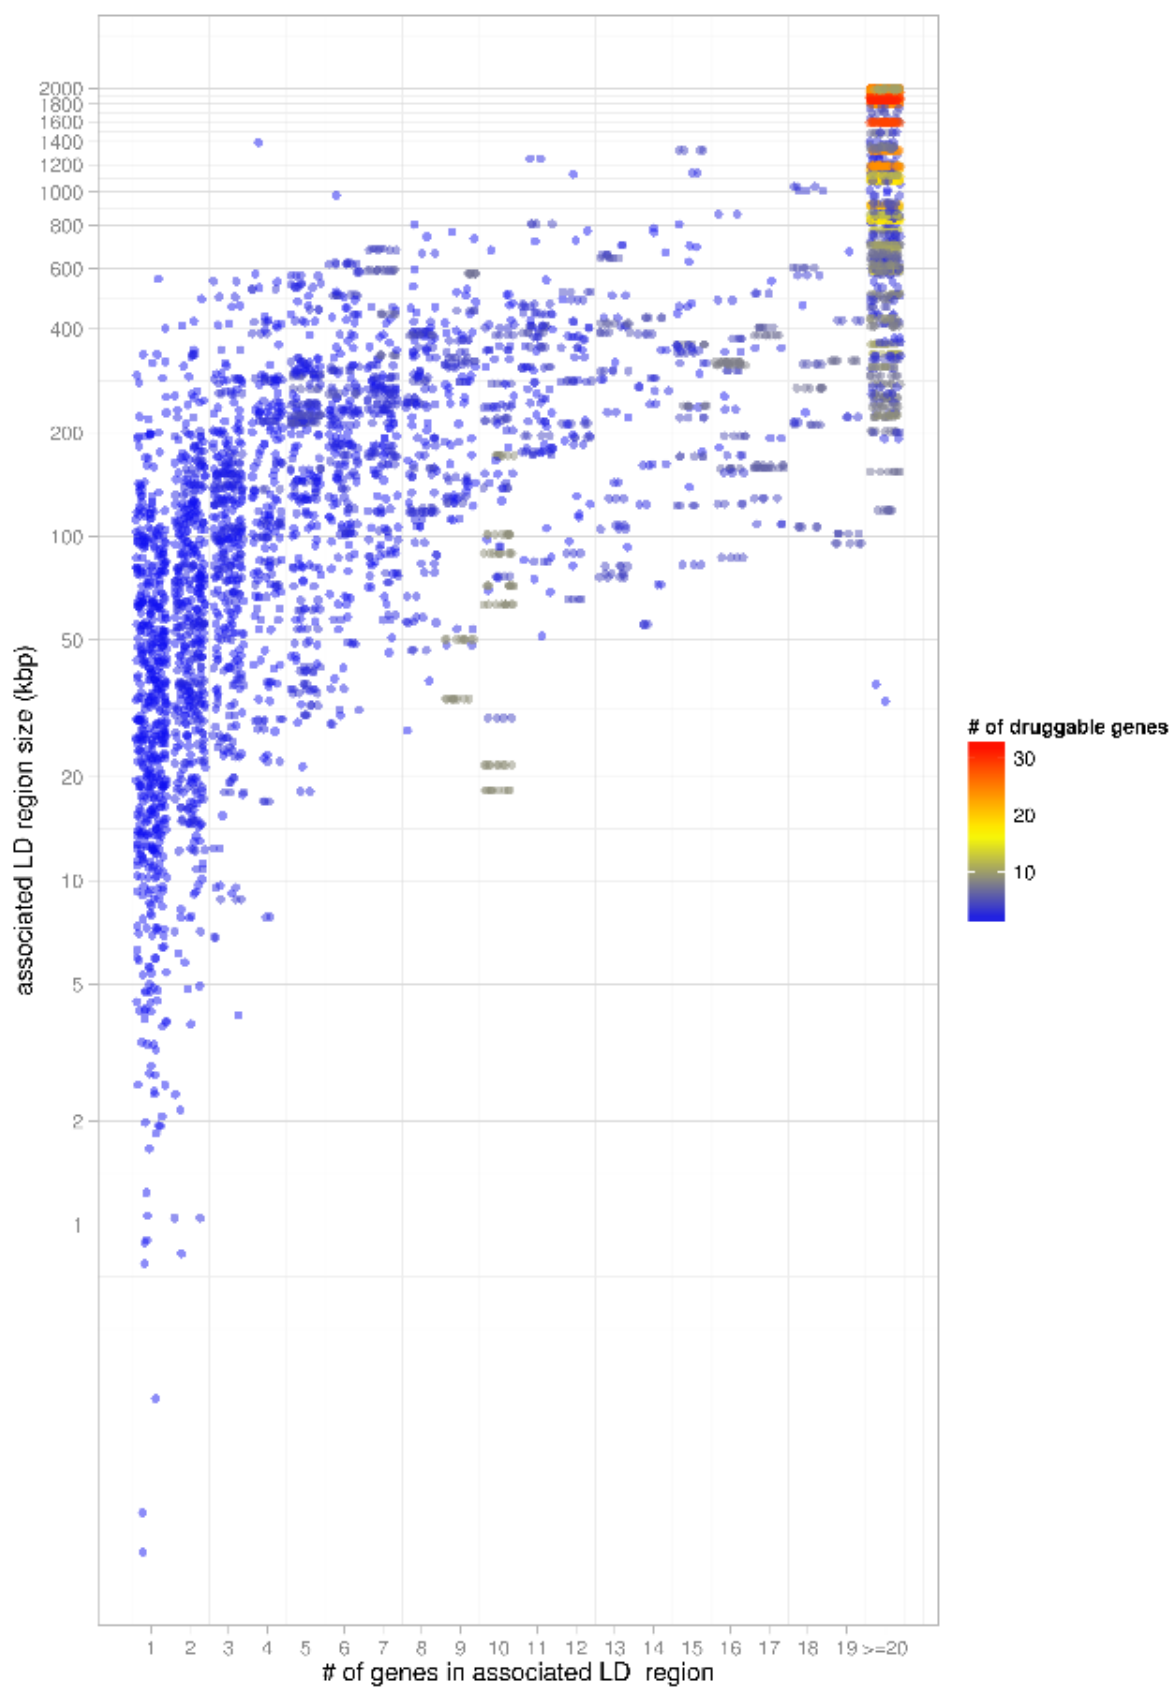

**Fig. S2.** Number of protein-coding genes in LD region. Shown above is a jittered line plot, where each point represents an LD region, its position on the x-axis is the number of protein-coding genes found in the region, and its position on the y-axis is the length (in kbp) of the region. The number of druggable genes within the region is color-coded.

| Diseases (N=184)                                                  | Digestive System Diseases  |            |                |            | Neoplasms                           |            |                |            | Nervous System Diseases   |            |                |            | Cardiovascular Diseases  |            |                |            |         |         |        |         |        |        |        |        |         |         |         |         |        |        |        |        |
|-------------------------------------------------------------------|----------------------------|------------|----------------|------------|-------------------------------------|------------|----------------|------------|---------------------------|------------|----------------|------------|--------------------------|------------|----------------|------------|---------|---------|--------|---------|--------|--------|--------|--------|---------|---------|---------|---------|--------|--------|--------|--------|
| Studies (N=609)                                                   | 106 (Est. Samples=234938)  |            |                |            | 187 (Est. Samples=478188)           |            |                |            | 104 (Est. Samples=323729) |            |                |            | 84 (Est. Samples=426777) |            |                |            |         |         |        |         |        |        |        |        |         |         |         |         |        |        |        |        |
| Associations (N=3079)                                             | 705                        |            |                |            | 783                                 |            |                |            | 425                       |            |                |            | 388                      |            |                |            |         |         |        |         |        |        |        |        |         |         |         |         |        |        |        |        |
| LD Regions (N=1830)                                               | 417                        |            |                |            | 476                                 |            |                |            | 286                       |            |                |            | 228                      |            |                |            |         |         |        |         |        |        |        |        |         |         |         |         |        |        |        |        |
| LD Region Genes (N=4293)                                          | 1306                       |            |                |            | 1466                                |            |                |            | 997                       |            |                |            | 670                      |            |                |            |         |         |        |         |        |        |        |        |         |         |         |         |        |        |        |        |
| Druggable Genes (N=727)                                           | 256                        |            |                |            | 219                                 |            |                |            | 170                       |            |                |            | 135                      |            |                |            |         |         |        |         |        |        |        |        |         |         |         |         |        |        |        |        |
| Druggable Gene Priority (N=727)                                   | Tier 1<br>105              |            | Tier >1<br>151 |            | Tier 1<br>79                        |            | Tier >1<br>140 |            | Tier 1<br>67              |            | Tier >1<br>103 |            | Tier 1<br>48             |            | Tier >1<br>87  |            |         |         |        |         |        |        |        |        |         |         |         |         |        |        |        |        |
| Distance Rank (N=727)                                             | <= 2<br>57                 | >= 3<br>65 | <= 2<br>76     | >= 3<br>96 | <= 2<br>46                          | >= 3<br>45 | <= 2<br>72     | >= 3<br>77 | <= 2<br>40                | >= 3<br>35 | <= 2<br>48     | >= 3<br>64 | <= 2<br>29               | >= 3<br>22 | <= 2<br>49     | >= 3<br>42 |         |         |        |         |        |        |        |        |         |         |         |         |        |        |        |        |
| All Compounds (N=198980)                                          | 16747                      | 9303       | 4157           | 2168       | 32763                               | 85817      | 7228           | 1592       | 83599                     | 98334      | 867            | 1258       | 10802                    | 5404       | 1995           | 2551       |         |         |        |         |        |        |        |        |         |         |         |         |        |        |        |        |
| USAN/INN Compounds (N=2047)                                       | 351                        | 204        | 17             | 19         | 519                                 | 729        | 71             | 24         | 808                       | 1057       | 30             | 18         | 359                      | 216        | 31             | 20         |         |         |        |         |        |        |        |        |         |         |         |         |        |        |        |        |
| Drugs (N=498)                                                     | 87                         | 55         | 3              | 3          | 154                                 | 28         | 18             | 4          | 113                       | 74         | 2              | 0          | 133                      | 27         | 2              | 6          |         |         |        |         |        |        |        |        |         |         |         |         |        |        |        |        |
| Drug I/Disease P concordant[C]/discordant[D] Drugs (N=108, N=241) | C<br>10                    | D<br>45    | C<br>2         | D<br>42    | C<br>0                              | D<br>2     | C<br>0         | D<br>2     | C<br>24                   | D<br>69    | C<br>1         | D<br>17    | C<br>2                   | D<br>8     | C<br>0         | D<br>2     | C<br>12 | D<br>35 | C<br>9 | D<br>42 | C<br>0 | D<br>1 | C<br>0 | D<br>0 | C<br>4  | D<br>60 | C<br>10 | D<br>11 | C<br>0 | D<br>1 | C<br>0 | D<br>3 |
| Targets (N=27, N=86)                                              | 3                          | 12         | 2              | 9          | 0                                   | 2          | 0              | 1          | 6                         | 8          | 1              | 6          | 1                        | 3          | 0              | 3          | 2       | 12      | 3      | 8       | 0      | 1      | 0      | 0      | 4       | 12      | 4       | 4       | 0      | 2      | 0      | 2      |
| Diseases (N=184)                                                  | Respiratory Tract Diseases |            |                |            | Skin and Connective Tissue Diseases |            |                |            | Immune System Diseases    |            |                |            | Mental Disorders         |            |                |            |         |         |        |         |        |        |        |        |         |         |         |         |        |        |        |        |
| Studies (N=609)                                                   | 47 (Est. Samples=188565)   |            |                |            | 107 (Est. Samples=195185)           |            |                |            | 130 (Est. Samples=268725) |            |                |            | 85 (Est. Samples=320019) |            |                |            |         |         |        |         |        |        |        |        |         |         |         |         |        |        |        |        |
| Associations (N=3079)                                             | 184                        |            |                |            | 628                                 |            |                |            | 764                       |            |                |            | 355                      |            |                |            |         |         |        |         |        |        |        |        |         |         |         |         |        |        |        |        |
| LD Regions (N=1830)                                               | 112                        |            |                |            | 392                                 |            |                |            | 491                       |            |                |            | 258                      |            |                |            |         |         |        |         |        |        |        |        |         |         |         |         |        |        |        |        |
| LD Region Genes (N=4293)                                          | 469                        |            |                |            | 1059                                |            |                |            | 1099                      |            |                |            | 993                      |            |                |            |         |         |        |         |        |        |        |        |         |         |         |         |        |        |        |        |
| Druggable Genes (N=727)                                           | 91                         |            |                |            | 181                                 |            |                |            | 211                       |            |                |            | 158                      |            |                |            |         |         |        |         |        |        |        |        |         |         |         |         |        |        |        |        |
| Druggable Gene Priority (N=727)                                   | Tier 1<br>32               |            | Tier >1<br>59  |            | Tier 1<br>71                        |            | Tier >1<br>110 |            | Tier 1<br>81              |            | Tier >1<br>130 |            | Tier 1<br>48             |            | Tier >1<br>110 |            |         |         |        |         |        |        |        |        |         |         |         |         |        |        |        |        |
| Distance Rank (N=727)                                             | <= 2<br>17                 | >= 3<br>23 | <= 2<br>22     | >= 3<br>44 | <= 2<br>39                          | >= 3<br>38 | <= 2<br>56     | >= 3<br>69 | <= 2<br>55                | >= 3<br>41 | <= 2<br>73     | >= 3<br>72 | <= 2<br>24               | >= 3<br>28 | <= 2<br>44     | >= 3<br>77 |         |         |        |         |        |        |        |        |         |         |         |         |        |        |        |        |
| All Compounds (N=198980)                                          | 75362                      | 72913      | 868            | 297        | 14601                               | 81285      | 5701           | 4465       | 44208                     | 8527       | 3284           | 1381       | 8171                     | 10264      | 955            | 548        |         |         |        |         |        |        |        |        |         |         |         |         |        |        |        |        |
| USAN/INN Compounds (N=2047)                                       | 460                        | 446        | 16             | 5          | 225                                 | 510        | 50             | 31         | 688                       | 165        | 19             | 22         | 279                      | 418        | 30             | 19         |         |         |        |         |        |        |        |        |         |         |         |         |        |        |        |        |
| Drugs (N=498)                                                     | 18                         | 11         | 0              | 2          | 80                                  | 46         | 5              | 7          | 76                        | 57         | 2              | 7          | 101                      | 31         | 6              | 2          |         |         |        |         |        |        |        |        |         |         |         |         |        |        |        |        |
| Drug I/Disease P concordant[C]/discordant[D] Drugs (N=108, N=241) | C<br>6                     | D<br>4     | C<br>0         | D<br>8     | C<br>0                              | D<br>0     | C<br>0         | D<br>1     | C<br>21                   | D<br>18    | C<br>6         | D<br>30    | C<br>0                   | D<br>4     | C<br>1         | D<br>3     | C<br>8  | D<br>40 | C<br>5 | D<br>42 | C<br>0 | D<br>2 | C<br>1 | D<br>4 | C<br>35 | D<br>30 | C<br>2  | D<br>10 | C<br>0 | D<br>1 | C<br>0 | D<br>1 |
| Targets (N=27, N=86)                                              | 2                          | 2          | 0              | 3          | 0                                   | 0          | 0              | 1          | 6                         | 8          | 2              | 11         | 0                        | 2          | 1              | 3          | 4       | 13      | 1      | 13      | 0      | 1      | 1      | 3      | 2       | 8       | 2       | 3       | 0      | 1      | 0      | 2      |

|                                                                  |                                                        |            |               |            |                          |            |               |            |                              |            |               |            |                                                                 |            |               |            |         |         |        |         |        |        |        |        |         |         |        |         |        |        |        |        |
|------------------------------------------------------------------|--------------------------------------------------------|------------|---------------|------------|--------------------------|------------|---------------|------------|------------------------------|------------|---------------|------------|-----------------------------------------------------------------|------------|---------------|------------|---------|---------|--------|---------|--------|--------|--------|--------|---------|---------|--------|---------|--------|--------|--------|--------|
| Diseases (N=116)                                                 | Male Urogenital Diseases                               |            |               |            | Musculoskeletal Diseases |            |               |            | Endocrine System Diseases    |            |               |            | Nutritional and Metabolic Diseases                              |            |               |            |         |         |        |         |        |        |        |        |         |         |        |         |        |        |        |        |
| Studies (N=326)                                                  | 52 (Est. Samples=184027)                               |            |               |            | 57 (Est. Samples=139636) |            |               |            | 77 (Est. Samples=224472)     |            |               |            | 83 (Est. Samples=562768)                                        |            |               |            |         |         |        |         |        |        |        |        |         |         |        |         |        |        |        |        |
| Associations (N=1572)                                            | 283                                                    |            |               |            | 322                      |            |               |            | 394                          |            |               |            | 455                                                             |            |               |            |         |         |        |         |        |        |        |        |         |         |        |         |        |        |        |        |
| LD Regions (N=952)                                               | 192                                                    |            |               |            | 184                      |            |               |            | 240                          |            |               |            | 265                                                             |            |               |            |         |         |        |         |        |        |        |        |         |         |        |         |        |        |        |        |
| LD Region Genes (N=2380)                                         | 722                                                    |            |               |            | 585                      |            |               |            | 823                          |            |               |            | 795                                                             |            |               |            |         |         |        |         |        |        |        |        |         |         |        |         |        |        |        |        |
| Druggable Genes (N=399)                                          | 109                                                    |            |               |            | 108                      |            |               |            | 128                          |            |               |            | 134                                                             |            |               |            |         |         |        |         |        |        |        |        |         |         |        |         |        |        |        |        |
| Druggable Gene Priority (N=399)                                  | Tier 1<br>33                                           |            | Tier >1<br>76 |            | Tier 1<br>43             |            | Tier >1<br>65 |            | Tier 1<br>41                 |            | Tier >1<br>87 |            | Tier 1<br>45                                                    |            | Tier >1<br>89 |            |         |         |        |         |        |        |        |        |         |         |        |         |        |        |        |        |
| Distance Rank (N=399)                                            | <= 2<br>15                                             | >= 3<br>22 | <= 2<br>37    | >= 3<br>44 | <= 2<br>26               | >= 3<br>21 | <= 2<br>28    | >= 3<br>41 | <= 2<br>24                   | >= 3<br>22 | <= 2<br>45    | >= 3<br>46 | <= 2<br>28                                                      | >= 3<br>22 | <= 2<br>45    | >= 3<br>54 |         |         |        |         |        |        |        |        |         |         |        |         |        |        |        |        |
| All Compounds (N=128023)                                         | 3436                                                   | 13033      | 1926          | 468        | 5185                     | 3633       | 1623          | 1050       | 22890                        | 73483      | 1701          | 4681       | 8848                                                            | 4104       | 2199          | 4008       |         |         |        |         |        |        |        |        |         |         |        |         |        |        |        |        |
| USAN/INN Compounds (N=1276)                                      | 116                                                    | 390        | 31            | 14         | 84                       | 137        | 14            | 9          | 435                          | 424        | 12            | 63         | 129                                                             | 71         | 9             | 59         |         |         |        |         |        |        |        |        |         |         |        |         |        |        |        |        |
| Drugs (N=288)                                                    | 25                                                     | 19         | 12            | 7          | 15                       | 55         | 4             | 2          | 73                           | 16         | 2             | 7          | 33                                                              | 41         | 2             | 5          |         |         |        |         |        |        |        |        |         |         |        |         |        |        |        |        |
| Drug I/Disease P concordant[C]/discordant[D] Drugs (N=30, N=128) | C<br>0                                                 | D<br>4     | C<br>0        | D<br>13    | C<br>2                   | D<br>5     | C<br>0        | D<br>4     | C<br>2                       | D<br>8     | C<br>5        | D<br>35    | C<br>0                                                          | D<br>3     | C<br>1        | D<br>0     | C<br>17 | D<br>40 | C<br>9 | D<br>3  | C<br>0 | D<br>1 | C<br>0 | D<br>5 | C<br>12 | D<br>10 | C<br>9 | D<br>26 | C<br>0 | D<br>1 | C<br>0 | D<br>4 |
| Targets (N=14, N=41)                                             | 0                                                      | 2          | 0             | 3          | 1                        | 1          | 0             | 3          | 2                            | 5          | 1             | 7          | 0                                                               | 2          | 1             | 0          | 5       | 6       | 2      | 3       | 0      | 1      | 0      | 3      | 2       | 5       | 2      | 5       | 0      | 1      | 0      | 2      |
| Diseases (N=116)                                                 | Female Urogenital Diseases and Pregnancy Complications |            |               |            | Eye Diseases             |            |               |            | Hemic and Lymphatic Diseases |            |               |            | Congenital, hereditary, and Neonatal Diseases and Abnormalities |            |               |            |         |         |        |         |        |        |        |        |         |         |        |         |        |        |        |        |
| Studies (N=326)                                                  | 41 (Est. Samples=110979)                               |            |               |            | 50 (Est. Samples=155095) |            |               |            | 43 (Est. Samples=40283)      |            |               |            | 29 (Est. Samples=53101)                                         |            |               |            |         |         |        |         |        |        |        |        |         |         |        |         |        |        |        |        |
| Associations (N=1572)                                            | 168                                                    |            |               |            | 246                      |            |               |            | 156                          |            |               |            | 98                                                              |            |               |            |         |         |        |         |        |        |        |        |         |         |        |         |        |        |        |        |
| LD Regions (N=952)                                               | 127                                                    |            |               |            | 157                      |            |               |            | 105                          |            |               |            | 76                                                              |            |               |            |         |         |        |         |        |        |        |        |         |         |        |         |        |        |        |        |
| LD Region Genes (N=2380)                                         | 546                                                    |            |               |            | 436                      |            |               |            | 356                          |            |               |            | 262                                                             |            |               |            |         |         |        |         |        |        |        |        |         |         |        |         |        |        |        |        |
| Druggable Genes (N=399)                                          | 89                                                     |            |               |            | 96                       |            |               |            | 70                           |            |               |            | 52                                                              |            |               |            |         |         |        |         |        |        |        |        |         |         |        |         |        |        |        |        |
| Druggable Gene Priority (N=399)                                  | Tier 1<br>30                                           |            | Tier >1<br>59 |            | Tier 1<br>26             |            | Tier >1<br>70 |            | Tier 1<br>34                 |            | Tier >1<br>36 |            | Tier 1<br>21                                                    |            | Tier >1<br>31 |            |         |         |        |         |        |        |        |        |         |         |        |         |        |        |        |        |
| Distance Rank (N=399)                                            | <= 2<br>11                                             | >= 3<br>22 | <= 2<br>24    | >= 3<br>42 | <= 2<br>22               | >= 3<br>7  | <= 2<br>42    | >= 3<br>34 | <= 2<br>17                   | >= 3<br>22 | <= 2<br>13    | >= 3<br>26 | <= 2<br>9                                                       | >= 3<br>12 | <= 2<br>15    | >= 3<br>16 |         |         |        |         |        |        |        |        |         |         |        |         |        |        |        |        |
| All Compounds (N=128023)                                         | 2700                                                   | 80230      | 390           | 359        | 83197                    | 1908       | 1498          | 195        | 5779                         | 867        | 527           | 1899       | 1334                                                            | 122        | 169           | 388        |         |         |        |         |        |        |        |        |         |         |        |         |        |        |        |        |
| USAN/INN Compounds (N=1276)                                      | 64                                                     | 695        | 12            | 10         | 703                      | 30         | 4             | 4          | 151                          | 62         | 7             | 11         | 111                                                             | 12         | 7             | 9          |         |         |        |         |        |        |        |        |         |         |        |         |        |        |        |        |
| Drugs (N=288)                                                    | 42                                                     | 20         | 2             | 7          | 48                       | 16         | 2             | 2          | 45                           | 18         | 0             | 0          | 54                                                              | 1          | 2             | 3          |         |         |        |         |        |        |        |        |         |         |        |         |        |        |        |        |
| Drug I/Disease P concordant[C]/discordant[D] Drugs (N=30, N=128) | C<br>4                                                 | D<br>31    | C<br>0        | D<br>14    | C<br>0                   | D<br>1     | C<br>0        | D<br>4     | C<br>1                       | D<br>19    | C<br>0        | D<br>1     | C<br>0                                                          | D<br>1     | C<br>1        | D<br>1     | C<br>0  | D<br>27 | C<br>0 | D<br>14 | C<br>0 | D<br>0 | C<br>0 | D<br>0 | C<br>2  | D<br>3  | C<br>0 | D<br>1  | C<br>0 | D<br>1 | C<br>0 | D<br>2 |
| Targets (N=14, N=41)                                             | 2                                                      | 2          | 0             | 4          | 0                        | 1          | 0             | 3          | 1                            | 5          | 0             | 1          | 0                                                               | 1          | 1             | 1          | 0       | 3       | 0      | 3       | 0      | 0      | 0      | 0      | 2       | 4       | 0      | 1       | 0      | 1      | 0      | 1      |





|                                                               |                      |      |         |      |                                       |      |         |      |                       |      |         |      |
|---------------------------------------------------------------|----------------------|------|---------|------|---------------------------------------|------|---------|------|-----------------------|------|---------|------|
| Diseases (N=3)                                                | Wounds and Injuries  |      |         |      | Psychological Phenomena and Processes |      |         |      | Occupational Diseases |      |         |      |
| Studies (N=3)                                                 | 1 (Est. Samples=288) |      |         |      | 1 (Est. Samples=5888)                 |      |         |      | 1 (Est. Samples=NA)   |      |         |      |
| Associations (N=3)                                            | 1                    |      |         |      | 1                                     |      |         |      | 1                     |      |         |      |
| LD Regions (N=3)                                              | 1                    |      |         |      | 1                                     |      |         |      | 1                     |      |         |      |
| LD Region Genes (N=7)                                         | 1                    |      |         |      | 5                                     |      |         |      | 1                     |      |         |      |
| Druggable Genes (N=0)                                         | 0                    |      |         |      | 0                                     |      |         |      | 0                     |      |         |      |
| Druggable Gene Priority (N=0)                                 | Tier 1               |      | Tier >1 |      | Tier 1                                |      | Tier >1 |      | Tier 1                |      | Tier >1 |      |
|                                                               | 0                    |      | 0       |      | 0                                     |      | 0       |      | 0                     |      | 0       |      |
| Distance Rank (N=0)                                           | <= 2                 | >= 3 | <= 2    | >= 3 | <= 2                                  | >= 3 | <= 2    | >= 3 | <= 2                  | >= 3 | <= 2    | >= 3 |
|                                                               | 0                    | 0    | 0       | 0    | 0                                     | 0    | 0       | 0    | 0                     | 0    | 0       | 0    |
| All Compounds (N=0)                                           | 0                    | 0    | 0       | 0    | 0                                     | 0    | 0       | 0    | 0                     | 0    | 0       | 0    |
| USAN/INN Compounds (N=0)                                      | 0                    | 0    | 0       | 0    | 0                                     | 0    | 0       | 0    | 0                     | 0    | 0       | 0    |
| Drugs (N=0)                                                   | 0                    | 0    | 0       | 0    | 0                                     | 0    | 0       | 0    | 0                     | 0    | 0       | 0    |
| Drug I/Disease P concordant[C]/discordant[D] Drugs (N=0, N=0) | C                    | D    | C       | D    | C                                     | D    | C       | D    | C                     | D    | C       | D    |
|                                                               | 0                    | 0    | 0       | 0    | 0                                     | 0    | 0       | 0    | 0                     | 0    | 0       | 0    |
| Targets (N=0, N=0)                                            | 0                    | 0    | 0       | 0    | 0                                     | 0    | 0       | 0    | 0                     | 0    | 0       | 0    |

**Fig. S3:** Translational potential of GWAS disease associations across all MeSH root disease areas and mental disorders. The figure illustrates the results from GWAS studies, including LD regions, druggable genes in those regions, and compounds/drugs that have activity against the product of the druggable genes. In the penultimate row, the numbers of drugs that have an indication that is concordant (C) or discordant (D) with the GWAS phenotype are displayed. In the final row, the number of cognate targets for the concordant or discordant drugs is shown. Note that for the purposes of the figure, a drug target is a single gene even if it is part of a complex that is targeted by the drug. Within each cell the values represent the number of unique entities. For example, the cells in the Associations row represent the number of unique rsids. However, some values can be replicated across the figure because a GWAS study may have researched several of the disease areas. Additionally, there is some non-additivity between consecutive rows, namely Druggable Gene Priority - Distance Rank and Drugs - Drug indication/Disease Phenotypes. In the case of the former, this is due to the same gene being further away from the associated variant in different studies, such that it falls into a different partition. For the later, this is due to missing indications for some of the drugs, such that concordance or discordance could not be assigned. The values in the row labels represent the unique number of items across the row. The estimated number of samples is the sum of all the cases involved in the respective studies.

| Diseases (N=78)                                                  | Digestive System Diseases |            |               |            | Neoplasms                |           |               |            | Nervous System Diseases  |            |               |            | Cardiovascular Diseases    |            |                |             |         |         |        |        |        |        |        |        |          |         |         |         |        |        |        |        |
|------------------------------------------------------------------|---------------------------|------------|---------------|------------|--------------------------|-----------|---------------|------------|--------------------------|------------|---------------|------------|----------------------------|------------|----------------|-------------|---------|---------|--------|--------|--------|--------|--------|--------|----------|---------|---------|---------|--------|--------|--------|--------|
| Studies (N=253)                                                  | 13 (Est. Samples=43443)   |            |               |            | 22 (Est. Samples=109650) |           |               |            | 29 (Est. Samples=188951) |            |               |            | 150 (Est. Samples=2383087) |            |                |             |         |         |        |        |        |        |        |        |          |         |         |         |        |        |        |        |
| Associations (N=1867)                                            | 48                        |            |               |            | 100                      |           |               |            | 125                      |            |               |            | 1486                       |            |                |             |         |         |        |        |        |        |        |        |          |         |         |         |        |        |        |        |
| LD Regions (N=941)                                               | 35                        |            |               |            | 68                       |           |               |            | 86                       |            |               |            | 692                        |            |                |             |         |         |        |        |        |        |        |        |          |         |         |         |        |        |        |        |
| LD Region Genes (N=2518)                                         | 246                       |            |               |            | 212                      |           |               |            | 206                      |            |               |            | 1951                       |            |                |             |         |         |        |        |        |        |        |        |          |         |         |         |        |        |        |        |
| Druggable Genes (N=489)                                          | 57                        |            |               |            | 34                       |           |               |            | 68                       |            |               |            | 371                        |            |                |             |         |         |        |        |        |        |        |        |          |         |         |         |        |        |        |        |
| Druggable Gene Priority (N=489)                                  | Tier 1<br>17              |            | Tier >1<br>40 |            | Tier 1<br>14             |           | Tier >1<br>20 |            | Tier 1<br>31             |            | Tier >1<br>37 |            | Tier 1<br>133              |            | Tier >1<br>238 |             |         |         |        |        |        |        |        |        |          |         |         |         |        |        |        |        |
| Distance Rank (N=489)                                            | <= 2<br>6                 | >= 3<br>13 | <= 2<br>9     | >= 3<br>33 | <= 2<br>8                | >= 3<br>9 | <= 2<br>12    | >= 3<br>12 | <= 2<br>26               | >= 3<br>13 | <= 2<br>22    | >= 3<br>26 | <= 2<br>75                 | >= 3<br>78 | <= 2<br>129    | >= 3<br>145 |         |         |        |        |        |        |        |        |          |         |         |         |        |        |        |        |
| All Compounds (N=98267)                                          | 535                       | 852        | 45            | 184        | 4780                     | 2795      | 149           | 18         | 13108                    | 8850       | 23188         | 24169      | 35958                      | 30031      | 26556          | 26364       |         |         |        |        |        |        |        |        |          |         |         |         |        |        |        |        |
| USAN/INN Compounds (N=1265)                                      | 24                        | 30         | 2             | 3          | 76                       | 28        | 0             | 0          | 196                      | 41         | 88            | 93         | 676                        | 608        | 143            | 109         |         |         |        |        |        |        |        |        |          |         |         |         |        |        |        |        |
| Drugs (N=322)                                                    | 0                         | 8          | 0             | 2          | 26                       | 19        | 0             | 0          | 51                       | 11         | 0             | 2          | 196                        | 67         | 17             | 2           |         |         |        |        |        |        |        |        |          |         |         |         |        |        |        |        |
| Drug I/Disease P concordant[C]/discordant[D] Drugs (N=160, N=84) | C<br>0                    | D<br>0     | C<br>5        | D<br>2     | C<br>0                   | D<br>0    | C<br>0        | D<br>1     | C<br>14                  | D<br>2     | C<br>0        | D<br>11    | C<br>0                     | D<br>0     | C<br>0         | D<br>0      | C<br>21 | D<br>14 | C<br>9 | D<br>0 | C<br>0 | D<br>0 | C<br>0 | D<br>1 | C<br>127 | D<br>20 | C<br>23 | D<br>35 | C<br>4 | D<br>0 | C<br>0 | D<br>1 |
| Targets (N=31, N=48)                                             | 0                         | 0          | 1             | 2          | 0                        | 0         | 0             | 1          | 1                        | 1          | 0             | 3          | 0                          | 0          | 0              | 0           | 5       | 7       | 2      | 0      | 0      | 0      | 1      | 20     | 12       | 7       | 16      | 2       | 0      | 0      | 1      |        |

  

| Diseases (N=78)                                                  | Respiratory Tract Diseases |            |               |            | Skin and Connective Tissue Diseases |            |               |            | Immune System Diseases  |            |               |            | Mental Disorders         |            |               |            |        |        |        |        |        |        |        |        |         |         |        |        |        |        |        |        |
|------------------------------------------------------------------|----------------------------|------------|---------------|------------|-------------------------------------|------------|---------------|------------|-------------------------|------------|---------------|------------|--------------------------|------------|---------------|------------|--------|--------|--------|--------|--------|--------|--------|--------|---------|---------|--------|--------|--------|--------|--------|--------|
| Studies (N=253)                                                  | 17 (Est. Samples=182096)   |            |               |            | 19 (Est. Samples=94510)             |            |               |            | 16 (Est. Samples=54075) |            |               |            | 39 (Est. Samples=329989) |            |               |            |        |        |        |        |        |        |        |        |         |         |        |        |        |        |        |        |
| Associations (N=1867)                                            | 117                        |            |               |            | 68                                  |            |               |            | 66                      |            |               |            | 107                      |            |               |            |        |        |        |        |        |        |        |        |         |         |        |        |        |        |        |        |
| LD Regions (N=941)                                               | 71                         |            |               |            | 47                                  |            |               |            | 53                      |            |               |            | 80                       |            |               |            |        |        |        |        |        |        |        |        |         |         |        |        |        |        |        |        |
| LD Region Genes (N=2518)                                         | 300                        |            |               |            | 159                                 |            |               |            | 259                     |            |               |            | 246                      |            |               |            |        |        |        |        |        |        |        |        |         |         |        |        |        |        |        |        |
| Druggable Genes (N=489)                                          | 62                         |            |               |            | 34                                  |            |               |            | 65                      |            |               |            | 61                       |            |               |            |        |        |        |        |        |        |        |        |         |         |        |        |        |        |        |        |
| Druggable Gene Priority (N=489)                                  | Tier 1<br>23               |            | Tier >1<br>39 |            | Tier 1<br>15                        |            | Tier >1<br>19 |            | Tier 1<br>21            |            | Tier >1<br>44 |            | Tier 1<br>27             |            | Tier >1<br>34 |            |        |        |        |        |        |        |        |        |         |         |        |        |        |        |        |        |
| Distance Rank (N=489)                                            | <= 2<br>12                 | >= 3<br>15 | <= 2<br>14    | >= 3<br>31 | <= 2<br>8                           | >= 3<br>12 | <= 2<br>10    | >= 3<br>12 | <= 2<br>13              | >= 3<br>14 | <= 2<br>14    | >= 3<br>32 | <= 2<br>17               | >= 3<br>11 | <= 2<br>18    | >= 3<br>19 |        |        |        |        |        |        |        |        |         |         |        |        |        |        |        |        |
| All Compounds (N=98267)                                          | 3924                       | 947        | 224           | 240        | 4653                                | 2980       | 460           | 21         | 1390                    | 742        | 1057          | 731        | 6937                     | 2730       | 166           | 1465       |        |        |        |        |        |        |        |        |         |         |        |        |        |        |        |        |
| USAN/INN Compounds (N=1265)                                      | 47                         | 27         | 11            | 6          | 64                                  | 43         | 19            | 2          | 45                      | 32         | 19            | 9          | 140                      | 24         | 5             | 6          |        |        |        |        |        |        |        |        |         |         |        |        |        |        |        |        |
| Drugs (N=322)                                                    | 11                         | 8          | 0             | 2          | 26                                  | 21         | 2             | 0          | 9                       | 5          | 2             | 3          | 45                       | 5          | 3             | 2          |        |        |        |        |        |        |        |        |         |         |        |        |        |        |        |        |
| Drug I/Disease P concordant[C]/discordant[D] Drugs (N=160, N=84) | C<br>1                     | D<br>7     | C<br>0        | D<br>5     | C<br>0                              | D<br>0     | C<br>0        | D<br>1     | C<br>14                 | D<br>2     | C<br>0        | D<br>12    | C<br>0                   | D<br>1     | C<br>0        | D<br>0     | C<br>1 | D<br>3 | C<br>0 | D<br>4 | C<br>0 | D<br>1 | C<br>0 | D<br>2 | C<br>13 | D<br>14 | C<br>2 | D<br>0 | C<br>0 | D<br>1 | C<br>0 | D<br>1 |
| Targets (N=31, N=48)                                             | 2                          | 2          | 0             | 1          | 0                                   | 0          | 0             | 1          | 1                       | 1          | 0             | 4          | 0                        | 1          | 0             | 0          | 1      | 2      | 0      | 4      | 0      | 1      | 0      | 1      | 4       | 7       | 2      | 0      | 0      | 1      | 0      | 2      |

|                                                                  |                                                        |            |               |            |                          |           |               |            |                              |            |               |            |                                                                 |            |                |             |        |         |        |         |        |        |        |        |         |         |        |         |        |        |        |        |
|------------------------------------------------------------------|--------------------------------------------------------|------------|---------------|------------|--------------------------|-----------|---------------|------------|------------------------------|------------|---------------|------------|-----------------------------------------------------------------|------------|----------------|-------------|--------|---------|--------|---------|--------|--------|--------|--------|---------|---------|--------|---------|--------|--------|--------|--------|
| Diseases (N=61)                                                  | Male Urogenital Diseases                               |            |               |            | Musculoskeletal Diseases |           |               |            | Endocrine System Diseases    |            |               |            | Nutritional and Metabolic Diseases                              |            |                |             |        |         |        |         |        |        |        |        |         |         |        |         |        |        |        |        |
| Studies (N=247)                                                  | 18 (Est. Samples=373808)                               |            |               |            | 37 (Est. Samples=403652) |           |               |            | 63 (Est. Samples=730637)     |            |               |            | 133 (Est. Samples=2279389)                                      |            |                |             |        |         |        |         |        |        |        |        |         |         |        |         |        |        |        |        |
| Associations (N=1831)                                            | 107                                                    |            |               |            | 272                      |           |               |            | 354                          |            |               |            | 828                                                             |            |                |             |        |         |        |         |        |        |        |        |         |         |        |         |        |        |        |        |
| LD Regions (N=1010)                                              | 75                                                     |            |               |            | 158                      |           |               |            | 210                          |            |               |            | 435                                                             |            |                |             |        |         |        |         |        |        |        |        |         |         |        |         |        |        |        |        |
| LD Region Genes (N=2445)                                         | 305                                                    |            |               |            | 330                      |           |               |            | 594                          |            |               |            | 1278                                                            |            |                |             |        |         |        |         |        |        |        |        |         |         |        |         |        |        |        |        |
| Druggable Genes (N=424)                                          | 56                                                     |            |               |            | 59                       |           |               |            | 105                          |            |               |            | 236                                                             |            |                |             |        |         |        |         |        |        |        |        |         |         |        |         |        |        |        |        |
| Druggable Gene Priority (N=424)                                  | Tier 1<br>21                                           |            | Tier >1<br>35 |            | Tier 1<br>19             |           | Tier >1<br>40 |            | Tier 1<br>31                 |            | Tier >1<br>74 |            | Tier 1<br>78                                                    |            | Tier >1<br>158 |             |        |         |        |         |        |        |        |        |         |         |        |         |        |        |        |        |
| Distance Rank (N=424)                                            | <= 2<br>6                                              | >= 3<br>16 | <= 2<br>12    | >= 3<br>24 | <= 2<br>13               | >= 3<br>8 | <= 2<br>24    | >= 3<br>18 | <= 2<br>24                   | >= 3<br>11 | <= 2<br>36    | >= 3<br>43 | <= 2<br>50                                                      | >= 3<br>39 | <= 2<br>66     | >= 3<br>109 |        |         |        |         |        |        |        |        |         |         |        |         |        |        |        |        |
| All Compounds (N=148910)                                         | 925                                                    | 3576       | 83            | 852        | 73049                    | 6072      | 155           | 828        | 4806                         | 983        | 4636          | 1842       | 17930                                                           | 6800       | 5999           | 4294        |        |         |        |         |        |        |        |        |         |         |        |         |        |        |        |        |
| USAN/INN Compounds (N=1322)                                      | 60                                                     | 69         | 0             | 7          | 476                      | 52        | 3             | 9          | 111                          | 56         | 28            | 17         | 323                                                             | 162        | 37             | 36          |        |         |        |         |        |        |        |        |         |         |        |         |        |        |        |        |
| Drugs (N=266)                                                    | 2                                                      | 12         | 0             | 4          | 30                       | 12        | 2             | 0          | 48                           | 4          | 1             | 5          | 47                                                              | 40         | 3              | 7           |        |         |        |         |        |        |        |        |         |         |        |         |        |        |        |        |
| Drug I/Disease P concordant[C]/discordant[D] Drugs (N=81, N=119) | C<br>0                                                 | D<br>2     | C<br>0        | D<br>10    | C<br>0                   | D<br>0    | C<br>0        | D<br>2     | C<br>20                      | D<br>0     | C<br>2        | D<br>6     | C<br>0                                                          | D<br>1     | C<br>0         | D<br>0      | C<br>4 | D<br>37 | C<br>1 | D<br>2  | C<br>0 | D<br>0 | C<br>0 | D<br>4 | C<br>19 | D<br>15 | C<br>3 | D<br>24 | C<br>0 | D<br>1 | C<br>0 | D<br>5 |
| Targets (N=24, N=38)                                             | 0                                                      | 2          | 0             | 4          | 0                        | 0         | 0             | 1          | 4                            | 0          | 2             | 3          | 0                                                               | 1          | 0              | 0           | 4      | 5       | 1      | 2       | 0      | 0      | 0      | 2      | 10      | 8       | 3      | 7       | 0      | 1      | 0      | 3      |
| Diseases (N=61)                                                  | Female Urogenital Diseases and Pregnancy Complications |            |               |            | Eye Diseases             |           |               |            | Hemic and Lymphatic Diseases |            |               |            | Congenital, hereditary, and Neonatal Diseases and Abnormalities |            |                |             |        |         |        |         |        |        |        |        |         |         |        |         |        |        |        |        |
| Studies (N=247)                                                  | 14 (Est. Samples=367135)                               |            |               |            | 17 (Est. Samples=138545) |           |               |            | 45 (Est. Samples=495172)     |            |               |            | 47 (Est. Samples=442374)                                        |            |                |             |        |         |        |         |        |        |        |        |         |         |        |         |        |        |        |        |
| Associations (N=1831)                                            | 99                                                     |            |               |            | 98                       |           |               |            | 488                          |            |               |            | 283                                                             |            |                |             |        |         |        |         |        |        |        |        |         |         |        |         |        |        |        |        |
| LD Regions (N=1010)                                              | 65                                                     |            |               |            | 71                       |           |               |            | 265                          |            |               |            | 178                                                             |            |                |             |        |         |        |         |        |        |        |        |         |         |        |         |        |        |        |        |
| LD Region Genes (N=2445)                                         | 304                                                    |            |               |            | 254                      |           |               |            | 812                          |            |               |            | 462                                                             |            |                |             |        |         |        |         |        |        |        |        |         |         |        |         |        |        |        |        |
| Druggable Genes (N=424)                                          | 58                                                     |            |               |            | 37                       |           |               |            | 136                          |            |               |            | 86                                                              |            |                |             |        |         |        |         |        |        |        |        |         |         |        |         |        |        |        |        |
| Druggable Gene Priority (N=424)                                  | Tier 1<br>23                                           |            | Tier >1<br>35 |            | Tier 1<br>12             |           | Tier >1<br>25 |            | Tier 1<br>41                 |            | Tier >1<br>95 |            | Tier 1<br>25                                                    |            | Tier >1<br>61  |             |        |         |        |         |        |        |        |        |         |         |        |         |        |        |        |        |
| Distance Rank (N=424)                                            | <= 2<br>7                                              | >= 3<br>17 | <= 2<br>11    | >= 3<br>25 | <= 2<br>10               | >= 3<br>2 | <= 2<br>15    | >= 3<br>11 | <= 2<br>21                   | >= 3<br>25 | <= 2<br>39    | >= 3<br>64 | <= 2<br>15                                                      | >= 3<br>13 | <= 2<br>28     | >= 3<br>39  |        |         |        |         |        |        |        |        |         |         |        |         |        |        |        |        |
| All Compounds (N=148910)                                         | 1699                                                   | 3700       | 651           | 852        | 3516                     | 53        | 72            | 574        | 11610                        | 4672       | 1489          | 1829       | 8407                                                            | 246        | 827            | 696         |        |         |        |         |        |        |        |        |         |         |        |         |        |        |        |        |
| USAN/INN Compounds (N=1322)                                      | 65                                                     | 74         | 1             | 7          | 175                      | 1         | 4             | 3          | 253                          | 111        | 12            | 32         | 271                                                             | 15         | 23             | 10          |        |         |        |         |        |        |        |        |         |         |        |         |        |        |        |        |
| Drugs (N=266)                                                    | 4                                                      | 12         | 0             | 4          | 17                       | 1         | 2             | 0          | 42                           | 45         | 0             | 3          | 61                                                              | 2          | 4              | 0           |        |         |        |         |        |        |        |        |         |         |        |         |        |        |        |        |
| Drug I/Disease P concordant[C]/discordant[D] Drugs (N=81, N=119) | C<br>0                                                 | D<br>2     | C<br>1        | D<br>10    | C<br>0                   | D<br>0    | C<br>0        | D<br>2     | C<br>1                       | D<br>9     | C<br>0        | D<br>1     | C<br>0                                                          | D<br>1     | C<br>0         | D<br>0      | C<br>8 | D<br>25 | C<br>4 | D<br>28 | C<br>0 | D<br>0 | C<br>0 | D<br>2 | C<br>35 | D<br>0  | C<br>2 | D<br>0  | C<br>0 | D<br>0 | C<br>0 | D<br>0 |
| Targets (N=24, N=38)                                             | 0                                                      | 2          | 1             | 4          | 0                        | 0         | 0             | 1          | 1                            | 2          | 0             | 1          | 0                                                               | 2          | 0              | 0           | 4      | 3       | 2      | 6       | 0      | 0      | 0      | 1      | 6       | 0       | 2      | 0       | 0      | 0      | 0      |        |



|                                                               | Wounds and Injuries    |      |         |      | Psychological Phenomena and Processes |      |         |      | Occupational Diseases |      |         |      |
|---------------------------------------------------------------|------------------------|------|---------|------|---------------------------------------|------|---------|------|-----------------------|------|---------|------|
| Diseases (N=4)                                                |                        |      |         |      |                                       |      |         |      |                       |      |         |      |
| Studies (N=3)                                                 | 2 (Est. Samples=30716) |      |         |      | 0 (Est. Samples=0)                    |      |         |      | 0 (Est. Samples=0)    |      |         |      |
| Associations (N=3)                                            | 3                      |      |         |      | 0                                     |      |         |      | 0                     |      |         |      |
| LD Regions (N=3)                                              | 3                      |      |         |      | 0                                     |      |         |      | 0                     |      |         |      |
| LD Region Genes (N=14)                                        | 14                     |      |         |      | 0                                     |      |         |      | 0                     |      |         |      |
| Druggable Genes (N=0)                                         | 0                      |      |         |      | 0                                     |      |         |      | 0                     |      |         |      |
| Druggable Gene Priority (N=0)                                 | Tier 1                 |      | Tier >1 |      | Tier 1                                |      | Tier >1 |      | Tier 1                |      | Tier >1 |      |
|                                                               | 0                      | 0    | 0       | 0    | 0                                     | 0    | 0       | 0    | 0                     | 0    | 0       |      |
| Distance Rank (N=0)                                           | <= 2                   | >= 3 | <= 2    | >= 3 | <= 2                                  | >= 3 | <= 2    | >= 3 | <= 2                  | >= 3 | <= 2    | >= 3 |
|                                                               | 0                      | 0    | 0       | 0    | 0                                     | 0    | 0       | 0    | 0                     | 0    | 0       | 0    |
| All Compounds (N=0)                                           | 0                      | 0    | 0       | 0    | 0                                     | 0    | 0       | 0    | 0                     | 0    | 0       | 0    |
| USAN/INN Compounds (N=0)                                      | 0                      | 0    | 0       | 0    | 0                                     | 0    | 0       | 0    | 0                     | 0    | 0       | 0    |
| Drugs (N=0)                                                   | 0                      | 0    | 0       | 0    | 0                                     | 0    | 0       | 0    | 0                     | 0    | 0       | 0    |
| Drug I/Disease P concordant[C]/discordant[D] Drugs (N=0, N=0) | C                      | D    | C       | D    | C                                     | D    | C       | D    | C                     | D    | C       | D    |
|                                                               | 0                      | 0    | 0       | 0    | 0                                     | 0    | 0       | 0    | 0                     | 0    | 0       | 0    |
| Targets (N=0, N=0)                                            | 0                      | 0    | 0       | 0    | 0                                     | 0    | 0       | 0    | 0                     | 0    | 0       | 0    |

**Fig. S4.** Translational potential of GWAS biomarker associations with relevance to disease across the all MeSH root disease areas and mental disorders. The figure illustrates the results from GWAS studies, including LD regions, druggable genes in those regions, and compounds/drugs that have activity against the product of the druggable genes. In the penultimate row, the numbers of drugs that have an indication that is concordant (C) or discordant (D) with the GWAS phenotype are displayed. In the final row, the number of cognate targets for the concordant or discordant drugs is shown. Note that for the purposes of the figure, a drug target is a single gene even if it is part of a complex that is targeted by the drug. Within each cell, the values represent the number of unique entities. For example, the cells in the Associations row represent the number of unique rsids. However, some values can be replicated across the figure because a GWAS study may have researched several of the disease areas. Additionally, there is some non-additivity between consecutive rows, namely Druggable Gene Priority - Distance Rank and Drugs - Drug indication/Disease Phenotypes. In the case of the former, this is due to the same gene being further away from the associated variant in different studies, such that it falls into a different partition. For the later, this is due to missing indications for some of the drugs, such that concordance or discordance could not be assigned. The values in the row labels represent the unique number of items across the row. The estimated number of samples is the sum of all the cases involved in the respective studies.

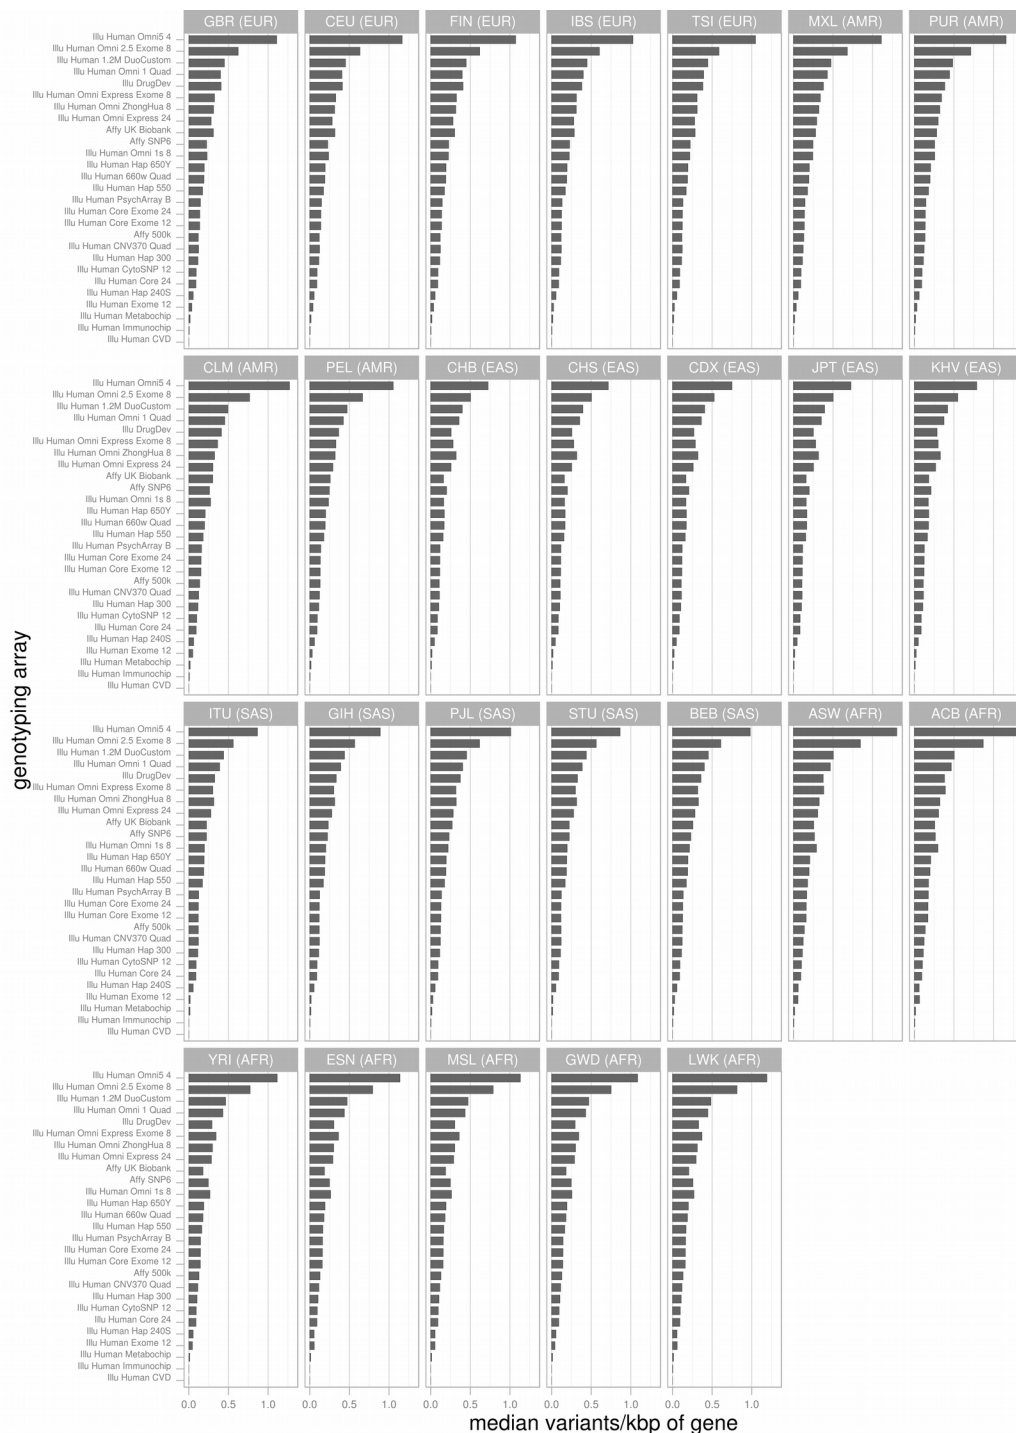

**Fig. S5.** Density of variant coverage across the druggable genome. Data are shown for directly typed variants in major commercial arrays including the DrugDev array introduced in this manuscript and for all the 1000 genomes phase 3 sub-populations (indicated at the top of each plot) with the super population group in brackets. EUR – European populations (GBR – British in England and Scotland, CEU – Utah Residents (CEPH) with Northern and Western Ancestry, FIN – Finnish in Finland, IBS – Iberian Population in Spain, TSI – Toscani in Italy). AMR – American populations (MXL – Mexican Ancestry from Los Angeles USA, PUR – Puerto Ricans from Puerto Rico, CLM – Colombians from Medellin, Colombia, PEL – Peruvians from Lima, Peru). EAS – East Asians (CHB – Han Chinese in Beijing, China, CHS – Southern Han Chinese, CDX – Chinese Dai in Xishuangbanna, China, JPT – Japanese in Tokyo, Japan, KHV – Kinh in Ho Chi Minh City, Vietnam). SAS – South Asians (ITU – Indian Telugu from the UK, GIH – Gujarati Indian from Houston, Texas, PJI – Punjabi from Lahore, Pakistan, STU – Sri Lankan Tamil from the UK, BEB – Bengali from Bangladesh). AFR – Africans (ASW – Americans of African Ancestry in SW USA, ACB – African Caribbeans in Barbados, YRI – Yoruba in Ibadan, Nigeria, ESN – Esan in Nigeria, MSL – Mende in Sierra Leone, GWD – Gambian in Western Divisions in the Gambia, LWK – Luhya in Webuye, Kenya)

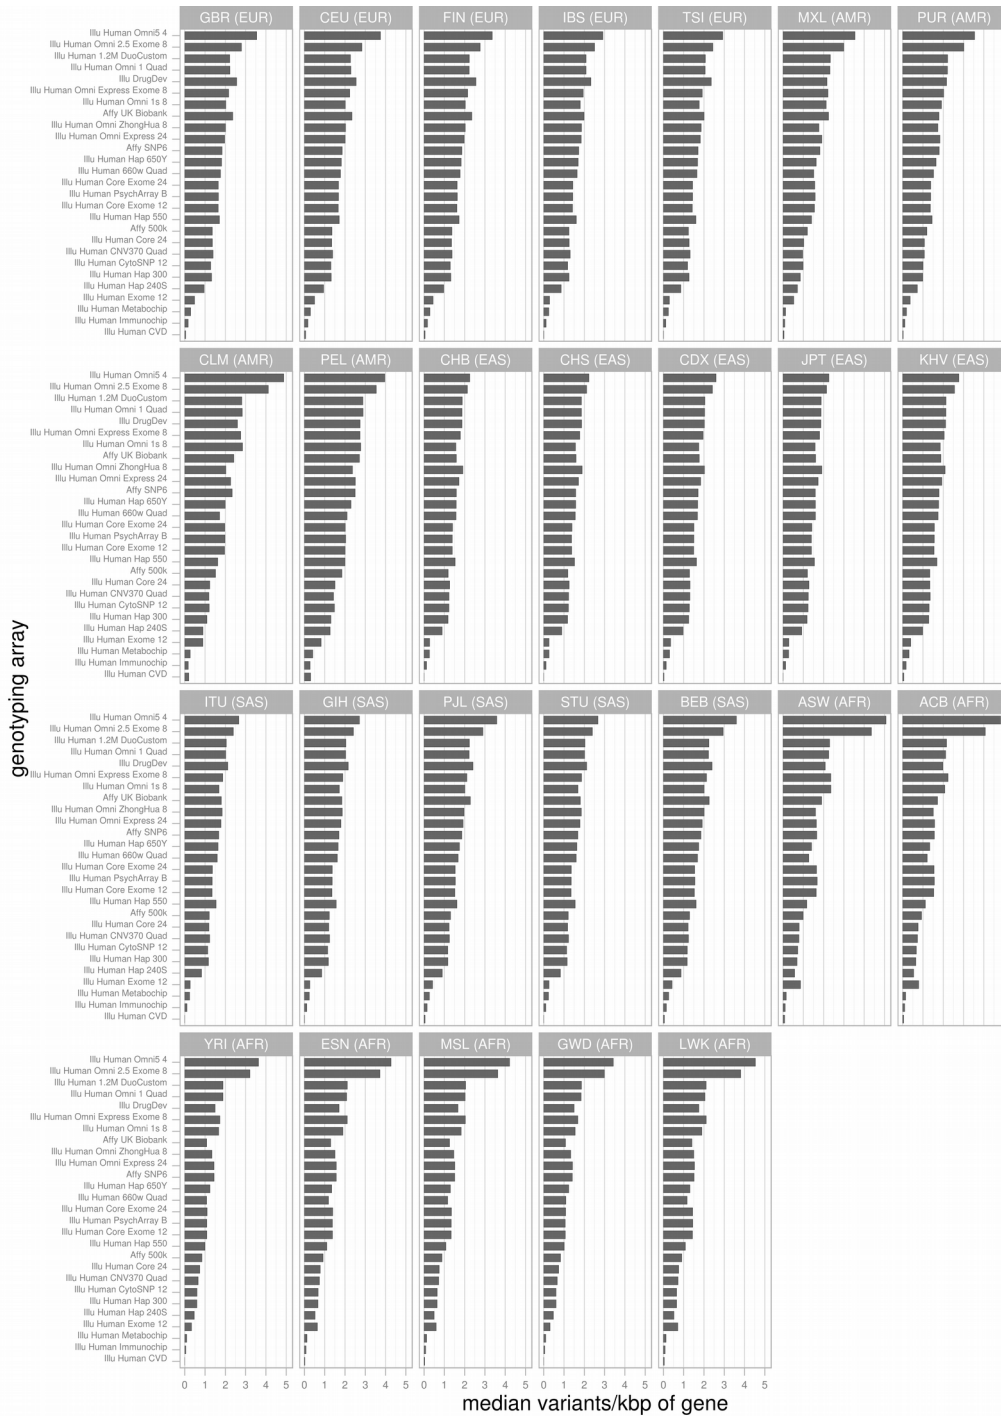

**Fig. S6.** Density of variant coverage across the druggable genome. Data are shown for directly typed and tagged variants (at  $r^2 \geq 0.8$ ) in major commercial arrays including the DrugDev array introduced in this manuscript and for all the 1000 genomes phase 3 sub-populations (indicated at the top of each plot) with the super population group in brackets. EUR – European populations (GBR –British in England and Scotland, CEU – Utah Residents (CEPH) with Northern and Western Ancestry, FIN - Finnish in Finland, IBS - Iberian Population in Spain, TSI - Toscani in Italy). AMR – American populations (MXL - Mexican Ancestry from Los Angeles USA, PUR - Puerto Ricans from Puerto Rico, CLM - Colombians from Medellin, Colombia, PEL - Peruvians from Lima, Peru). EAS – East Asians (CHB - Han Chinese in Beijing, China, CHS - Southern Han Chinese, CDX - Chinese Dai in Xishuangbanna, China, JPT - Japanese in Tokyo, Japan, KHV - Kinh in Ho Chi Minh City, Vietnam). SAS – South Asians (ITU - Indian Telugu from the UK, GIH - Gujarati Indian from Houston, Texas, PJJ - Punjabi from Lahore, Pakistan, STU - Sri Lankan Tamil from the UK, BEB - Bengali from Bangladesh). AFR – Africans (ASW - Americans of African Ancestry in SW USA, ACB - African Caribbeans in Barbados, YRI - Yoruba in Ibadan, Nigeria, ESN - Esan in Nigeria, MSL - Mende in Sierra Leone, GWD - Gambian in Western Divisions in the Gambia, LWK - Luhya in Webuye, Kenya)



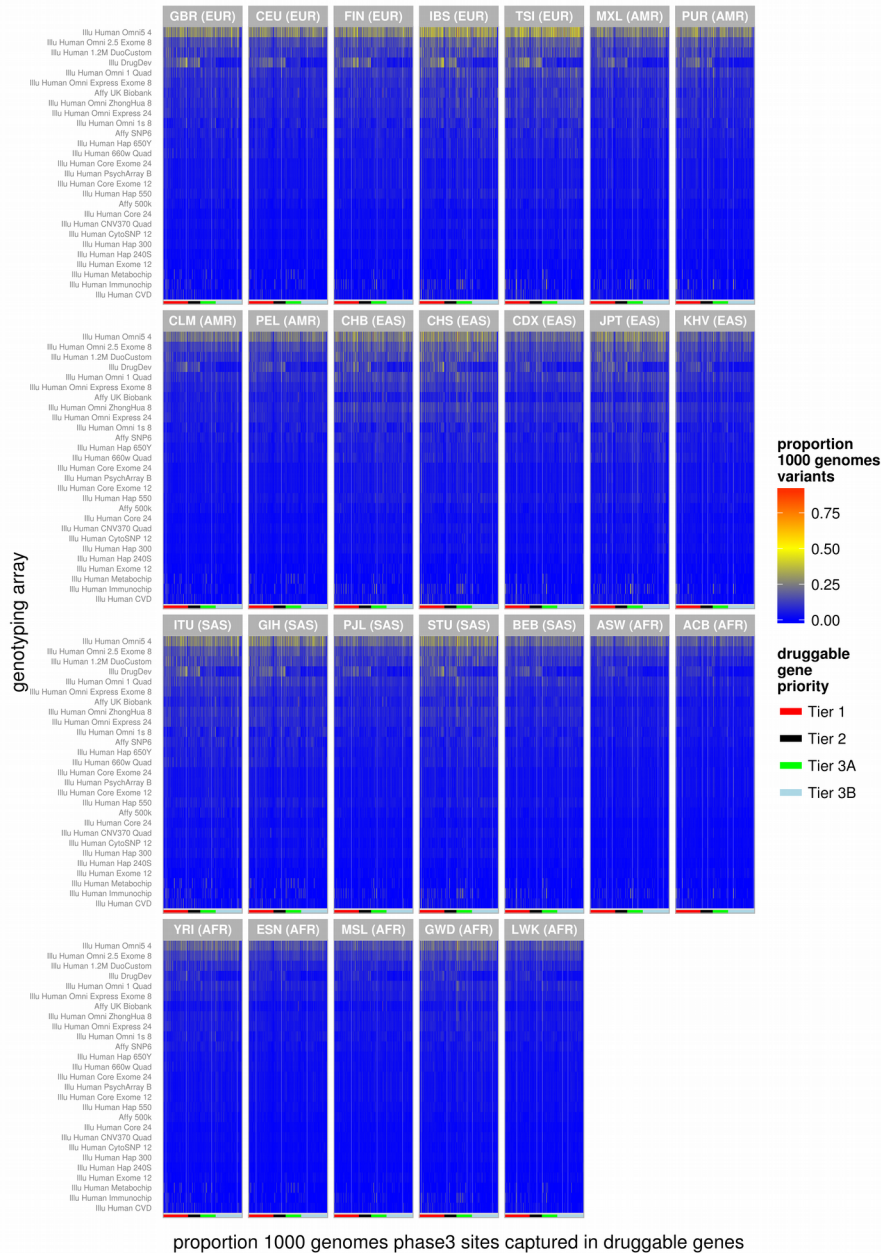

**Fig. S7.** Directly typed variant coverage of druggable genes in the 1000 genomes subpopulations. Coverage of the druggable gene set is represented as a proportion of 1000 genomes phase 3 variants (bi-allelic with  $\text{maf} \geq 0.005$ ) that are directly typed. Within each plot, a column represents a druggable gene and each row a genotyping array. The druggable genes are grouped according to their druggability tier, which is indicated by the color bar at the base of each plot. To aid visualization, the druggable genes are further sorted within each tier on their median coverage across all the arrays, and the genotyping arrays are sorted based on their median coverage of the druggable genome across all the 1000 genomes subpopulations, with the super population group in parentheses at the top of each section. EUR – European populations (GBR – British in England and Scotland, CEU – Utah Residents (CEPH) with Northern and Western Ancestry, FIN – Finnish in Finland, IBS – Iberian Population in Spain, TSI – Toscani in Italy). AMR – American populations (MXL – Mexican Ancestry from Los Angeles USA, PUR – Puerto Ricans from Puerto Rico, CLM – Colombians from Medellin, Colombia, PEL – Peruvians from Lima, Peru). EAS – East Asians (CHB – Han Chinese in Beijing, China, CHS – Southern Han Chinese, CDX – Chinese Dai in Xishuangbanna, China, JPT – Japanese in Tokyo, Japan, KHV – Kinh in Ho Chi Minh City, Vietnam). SAS – South Asians (ITU – Indian Telugu from the UK, GIH – Gujarati Indian from Houston, Texas, PJI – Punjabi from Lahore, Pakistan, STU – Sri Lankan Tamil from the UK, BEB – Bengali from Bangladesh). AFR – Africans (ASW – Americans of African Ancestry in SW USA, ACB – African Caribbeans in Barbados, YRI – Yoruba in Ibadan, Nigeria, ESN – Esan in Nigeria, MSL – Mende in Sierra Leone, GWD – Gambian in Western Divisions in the Gambia, LWK – Luhya in Webuye, Kenya). Note that all of the arrays contained content that could not be mapped to the 1000 genomes phase 3 (see fig. S10).

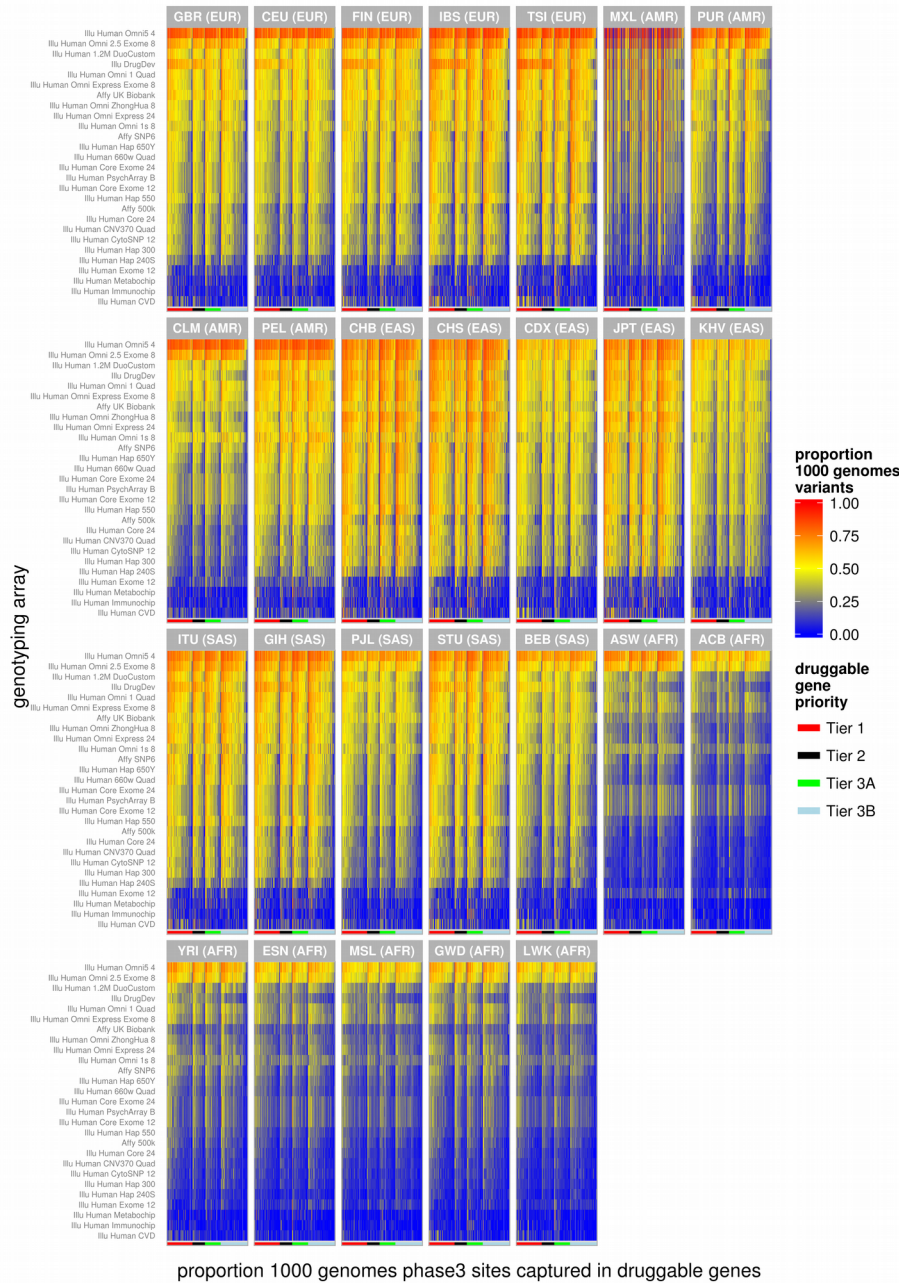

**Fig. S8.** Directly typed variant coverage of druggable genes in the 1000 genomes subpopulations. Coverage of the druggable gene set is represented as a proportion of 1000 genomes phase 3 variants (bi-allelic with  $\text{maf} \geq 0.005$ ) that are directly typed or tagged (at  $r^2 \geq 0.8$ ). Within each plot, a column represents a druggable gene and each row a genotyping array. The druggable genes are grouped according to their druggability tier, which is indicated by the color bar at the base of each plot. To aid visualization, the druggable genes are further sorted within each tier on their median coverage across all the arrays, and the genotyping arrays are sorted based on their median coverage of the druggable genome across all the 1000 genomes subpopulations, with the super population group in parentheses at the top of each section. EUR – European populations (GBR – British in England and Scotland, CEU – Utah Residents (CEPH) with Northern and Western Ancestry, FIN - Finnish in Finland, IBS - Iberian Population in Spain, TSI - Toscani in Italy). AMR – American populations (MXL - Mexican Ancestry from Los Angeles USA, PUR - Puerto Ricans from Puerto Rico, CLM - Colombians from Medellin, Colombia, PEL - Peruvians from Lima, Peru). EAS – East Asians (CHB - Han Chinese in Beijing, China, CHS - Southern Han Chinese, CDX - Chinese Dai in Xishuangbanna, China, JPT - Japanese in Tokyo, Japan, KHV - Kinh in Ho Chi Minh City, Vietnam). SAS – South Asians (ITU - Indian Telugu from the UK, GIH - Gujarati Indian from Houston, Texas, PJI - Punjabi from Lahore, Pakistan, STU - Sri Lankan Tamil from the UK, BEB - Bengali from Bangladesh). AFR – Africans (ASW - Americans of African Ancestry in SW USA, ACB - African Caribbeans in Barbados, YRI - Yoruba in Ibadan, Nigeria, ESN - Esan in Nigeria, MSL - Mende in Sierra Leone, GWD - Gambian in Western Divisions in the Gambia,

LWK - Luhya in Webuye, Kenya). Note that all of the arrays contained content that could not be mapped to the 1000 genomes phase 3 (see fig. S10).

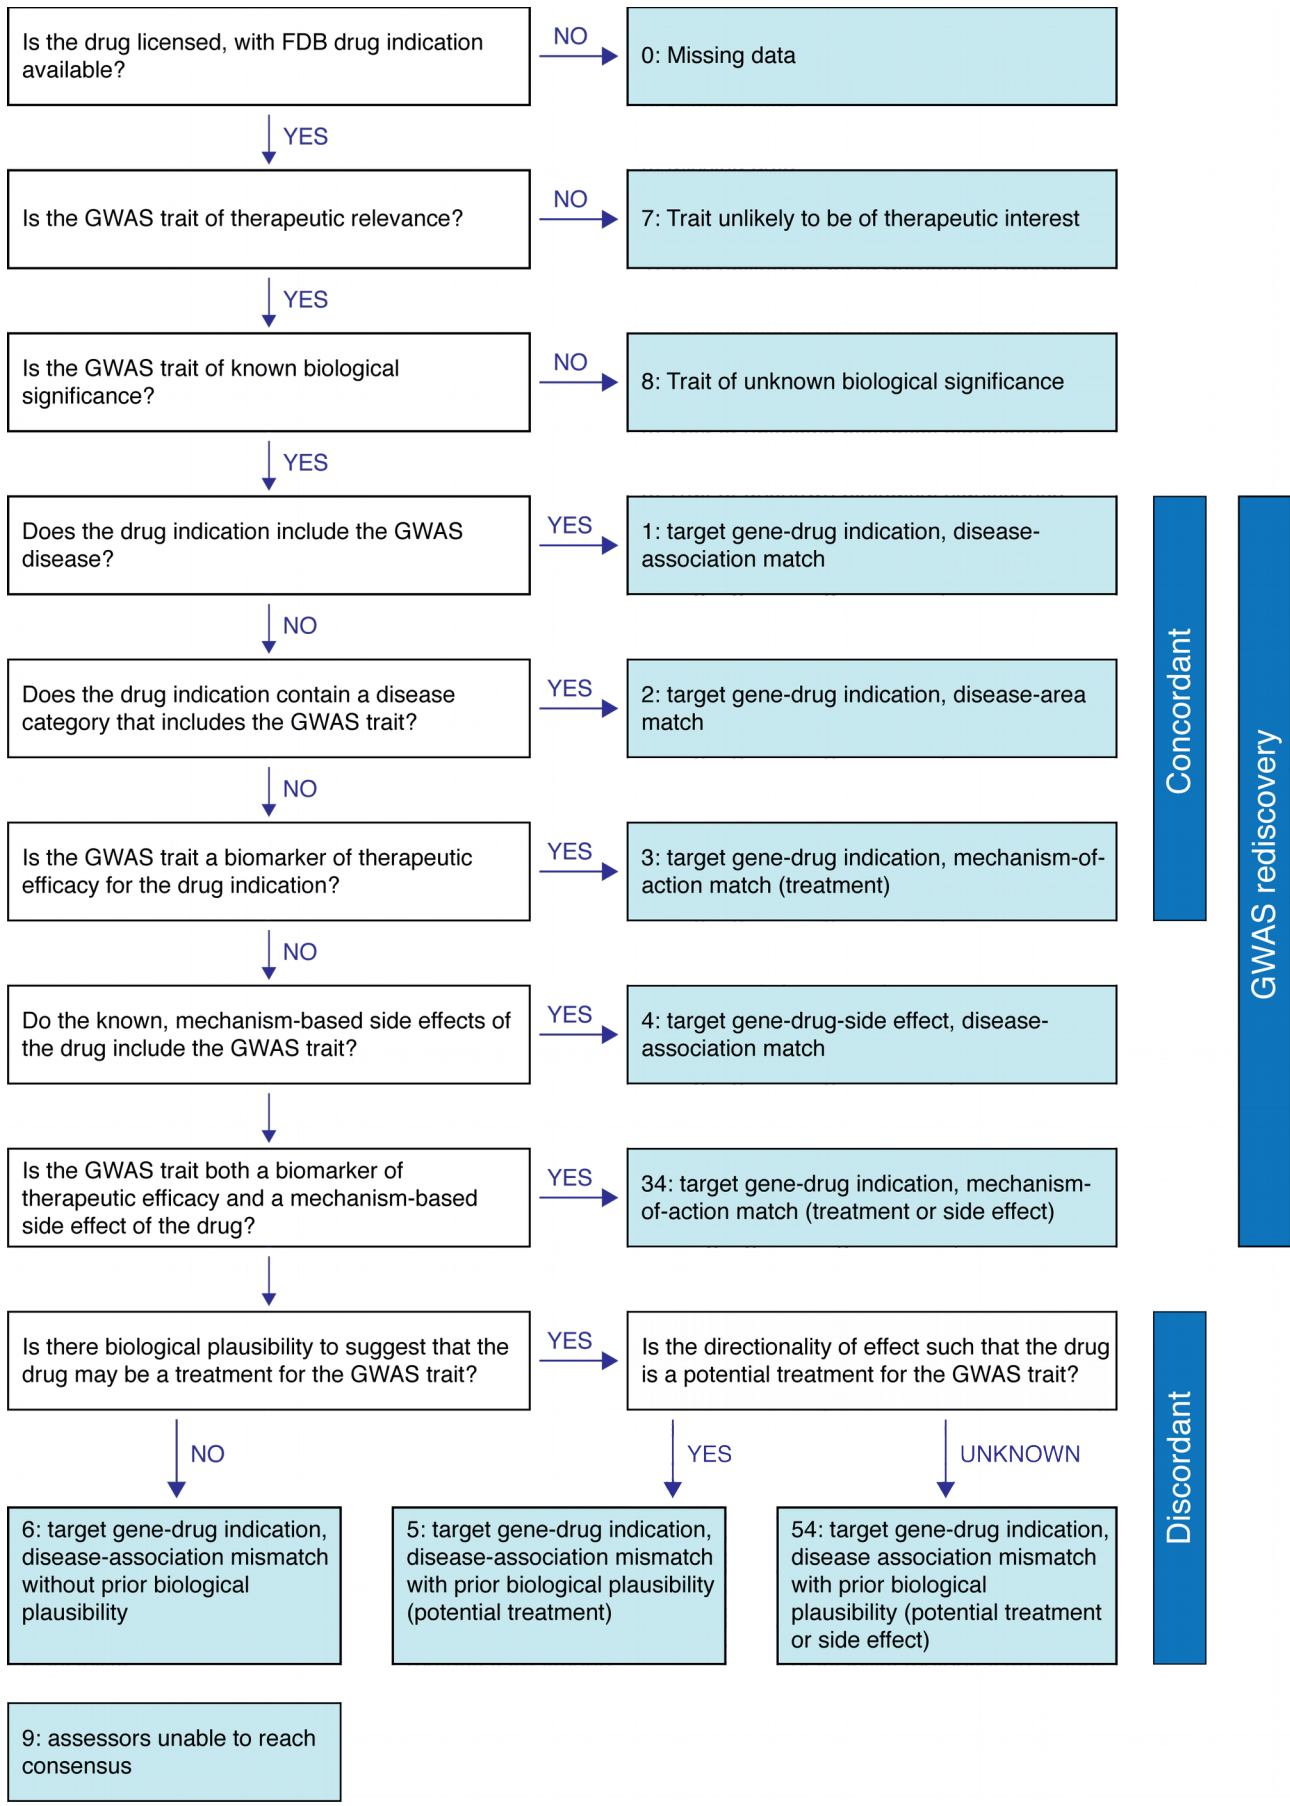

**Fig. S9.** Criteria for manual evaluation of the concordance/discordance of GWAS phenotypes and drug indications and side effects.

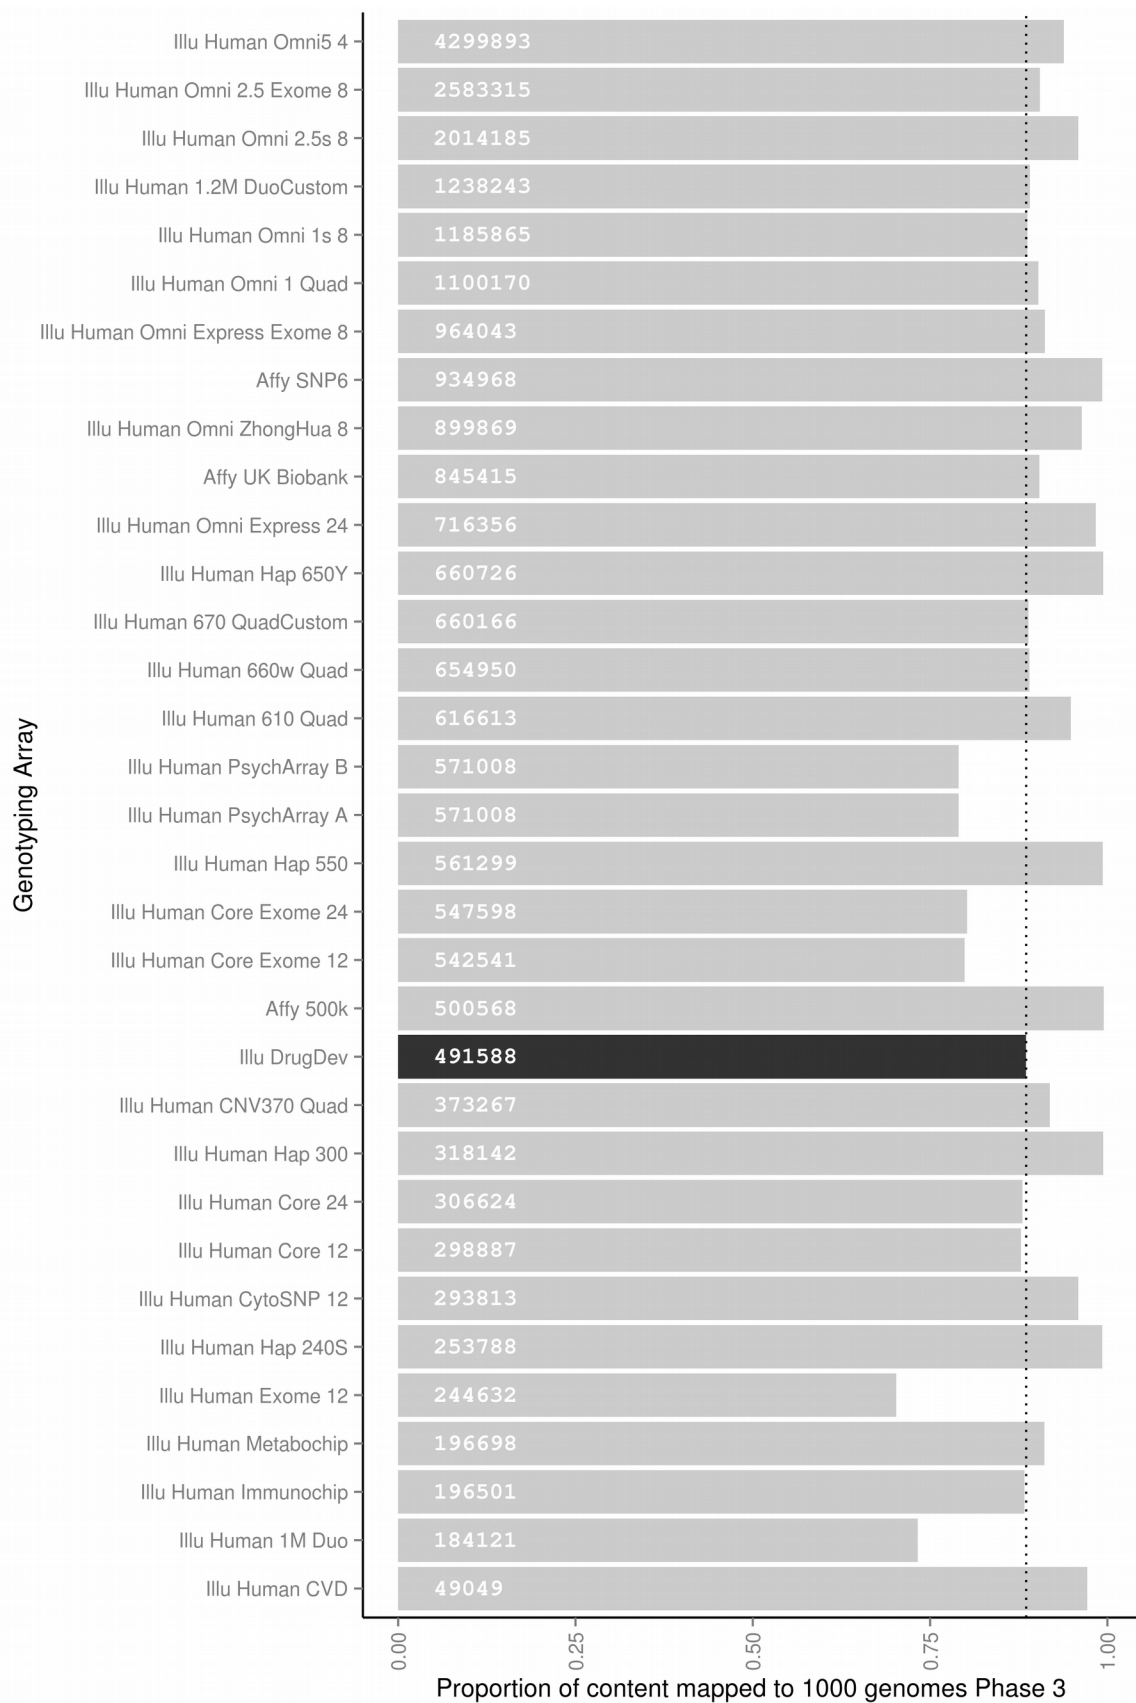

**Fig. S10.** Proportion of content in various commercial arrays mapped to the 1000 genomes phase 3 set of variants. The numbers in the bars show the total content on the array. The black bar is the DrugDev array introduced in this manuscript. The numbers after some of the array names indicate version numbers. The dashed line is to aid comparison of the Drug Dev array with the other arrays on the plot

**Table S1:** The druggable genome. Druggable genes, their locations and druggability priority, as well as the number of times each gene has overlapped an LD region surrounding a significant GWAS association ( $P \leq 5 \times 10^{-8}$ ) are indicated along with the type of molecule that binds to each of the druggable genes. Provided as an Excel file.

| Tier 1                 |     | Tier 2           |    | Tier 3      |     |
|------------------------|-----|------------------|----|-------------|-----|
| Pfam-A                 | #   | Pfam-A           | #  | Pfam-A      | #   |
| <b>Pkinase *</b>       | 194 | Pkinase *        | 81 | 7tm_1 *     | 113 |
| <b>7tm_1 *</b>         | 119 | 7tm_1 *          | 41 | V-set       | 74  |
| <b>Pkinase_Tyr *</b>   | 100 | Trypsin *        | 16 | Collagen    | 61  |
| <b>p450 *</b>          | 47  | Ion_trans *      | 13 | Ion_trans * | 61  |
| <b>fn3</b>             | 32  | Y_phosphatase *  | 11 | LRR_8       | 59  |
| <b>Ion_trans *</b>     | 30  | PI3_PI4_kinase * | 9  | Pkinase *   | 55  |
| <b>Neur_chan_LBD *</b> | 28  | Hormone_recep *  | 9  | Ig_2        | 55  |
| <b>Neur_chan_memb</b>  | 28  | zf-C4            | 9  | Trypsin *   | 52  |
| <b>SH2 *</b>           | 25  | Pro_isomerase *  | 9  | I-set       | 50  |
| <b>Hormone_recep *</b> | 25  | Neur_chan_LBD *  | 8  | EGF_CA      | 49  |
| <b>zf-C4</b>           | 25  | SH2 *            | 8  | Ig_3        | 44  |
| <b>ig</b>              | 23  | Pkinase_C        | 8  | EGF         | 42  |
| <b>ABC_tran *</b>      | 23  | Neur_chan_memb   | 8  | 7tm_4       | 41  |
| <b>ANF_receptor *</b>  | 22  | Bromodomain *    | 7  | Kelch_1     | 40  |
| <b>Pkinase_C</b>       | 21  | Pkinase_Tyr *    | 6  | Lectin_C    | 39  |

**Table S2.** Pfam-A domain content in three tiers of druggable genes. Summarized are counts of the 15 most frequent Pfam-A domains in genes assigned to each of the three tiers. Pfam domains with measured small molecule interactions are marked with asterisks. Tiers 1 and 2 incorporated domain types belonging to well-studied drug target classes, such as GPCRs, kinases, and ligand-gated ion channels. The domain composition of Tier 3 reflects enrichment for secreted and extracellular proteins, including constituents of the extracellular matrix, immunoglobulins, and leucine-rich repeats found on membrane-bound toll-like receptors.

| Gene    | Drug              | Drug type      | Curati on code | GWAS EFO term                                         | Drug Indication (FDB)                                                                                                                                                                                                                                                                             | Variant                                   | Pubmed ID                              | Min. dist. from drug gene (bp) | Dist. rank of drug gene | Genes in LD region | Drug genes in LD region |
|---------|-------------------|----------------|----------------|-------------------------------------------------------|---------------------------------------------------------------------------------------------------------------------------------------------------------------------------------------------------------------------------------------------------------------------------------------------------|-------------------------------------------|----------------------------------------|--------------------------------|-------------------------|--------------------|-------------------------|
| ALDH2   | Disulfiram        | Small molecule | 1              | alcohol drinking   drinking behavior                  | Alcoholism (adjunctive treatment)                                                                                                                                                                                                                                                                 | rs11066280  rs12229654  rs2074356   rs671 | 21270382  21372407  23364009  24277619 | 6016 - 790230                  | 1 -18                   | 22 - 33            | 2 - 4                   |
| PDE4D   | Aminophylline     | Small molecule | 1              | asthma                                                | Acute asthma   Acute exacerbation of chronic obstructive airways disease   Bronchial asthma   Chronic obstructive pulmonary disease   Left ventricular failure - cardiac failure - cardiac asthma   Reversible airways obstruction   Routine maintenance therapy in chronic bronchitis and asthma | rs1588265                                 | 19426955                               | 448153                         | 1                       | 2                  | 1                       |
| IGF1R   | Mecasermin        | Protein        | 1              | body height                                           | Growth failure due to primary IGF-1 deficiency                                                                                                                                                                                                                                                    | rs2871865                                 | 20881960  25429064                     | 2696                           | 1                       | 2                  | 1                       |
| TNFSF11 | Denosumab         | Antibody       | 1              | bone density                                          | Prevention of skeletal related events in advanced malignancy involving bone   Treatment of bone loss associated with hormone ablation in prostate cancer   Treatment of osteoporosis in postmenopausal women to prevent fractures                                                                 | rs17536328  rs9525638                     | 24945404                               | 6157 - 8295                    | 1                       | 1                  | 1                       |
| ESR1    | Tamoxifen Citrate | Small molecule | 1              | breast carcinoma                                      | Carcinoma of breast   Infertility - female - anovulatory                                                                                                                                                                                                                                          | rs140068132  rs3757318   rs9383938        | 22976474  23535729  25327703           | 9531 - 63713                   | 1 - 2                   | 2                  | 1                       |
| PLG     | Alteplase         | Enzyme         | 1              | coronary heart disease   large artery stroke   stroke | Acute ischaemic stroke: fibrinolytic treatment  Thrombolysis in acute myocardial infarction  Thrombolysis of occluded central venous access devices   Thrombolytic treatment in acute massive pulmonary embolism                                                                                  | rs10455872                                | 24262325                               | 113152                         | 3                       | 3                  | 2                       |
| TNF     | Adalimumab        | Antibody       | 1              | Crohn's disease                                       | Active polyarticular juvenile chronic arthritis-inadequate response to MTX   Active progressive rheumatoid arthritis   Moderate to severe plaque                                                                                                                                                  | rs1799964                                 | 21102463                               | 1036                           | 2                       | 13                 | 4                       |



|         |                      |                |   |                                                                                                   |                                                                                                                                                                                                                                                                                                                                                                                                                                                 |            |                     |        |   |   |   |
|---------|----------------------|----------------|---|---------------------------------------------------------------------------------------------------|-------------------------------------------------------------------------------------------------------------------------------------------------------------------------------------------------------------------------------------------------------------------------------------------------------------------------------------------------------------------------------------------------------------------------------------------------|------------|---------------------|--------|---|---|---|
|         |                      |                |   |                                                                                                   | psoriasis: when other treatment is inappropriate   Moderate/severe ulcerative colitis: when other treatment is inappropriate   Rheumatoid arthritis when inadequate response to DMARDs incl. methotrexate   Severe active rheumatoid arthritis   Severe ankylosing spondylitis in adults if conventional therapy inadequate   Treatment of active & progressive psoriatic arthritis when DMARD inadequate   Treatment of active Crohn's disease |            |                     |        |   |   |   |
| CACNA1D | Amlodipine           | Small molecule | 1 | diastolic blood pressure                                                                          | Essential hypertension when stabilised on same ingreds.in same proportions   Hypertension-not adequately controlled by individual components   Prinzmetal's angina   Prophylaxis of chronic stable angina pectoris   Treatment of essential hypertension                                                                                                                                                                                        | rs9810888  | 25249183            | 106912 | 1 | 1 | 1 |
| GUCY1A3 | Isosorbide Dinitrate | Small molecule | 1 | diastolic blood pressure                                                                          | Angina   Angina pectoris - prophylaxis of acute attacks   Angina pectoris - treatment of acute attacks   Congestive heart failure (adjunct)   Intracoronary use during angioplasty and to prevent/relieve coronary spasm   Left ventricular failure   Prophylaxis of angina pectoris   Treatment of angina pectoris   Treatment of unresponsive LVF, either post MI or of various aetiology   Treatment severe/unstable angina                  | rs13139571 | 21909115            | 7988   | 1 | 2 | 1 |
| NPC1L1  | Ezetimibe            | Small molecule | 1 | LDL cholesterol   low density lipoprotein cholesterol measurement   total cholesterol measurement | Combined hyperlipidaemia: lipid lowering therapy adjunct to diet   Homozygous familial hypercholesterolaemia (adjunct to statin therapy)   Homozygous familial hypercholesterolaemia: Adjunct to diet                                                                                                                                                                                                                                           | rs2072183  | 20686565   24097068 | 1734   | 1 | 1 | 1 |



|       |                |                |   |                                                                                                   |                                                                                                                                                                                                                                                                                                               |                      |                            |              |    |     |    |
|-------|----------------|----------------|---|---------------------------------------------------------------------------------------------------|---------------------------------------------------------------------------------------------------------------------------------------------------------------------------------------------------------------------------------------------------------------------------------------------------------------|----------------------|----------------------------|--------------|----|-----|----|
|       |                |                |   |                                                                                                   | Homozygous sitosterolaemia (phytosterolaemia)   Primary hypercholesterolaemia (hyperlipidaemia type IIa): Adjunct to diet   Primary hypercholesterolaemia: lipid lowering therapy adjunct to diet                                                                                                             |                      |                            |              |    |     |    |
| PPARA | Gemfibrozil    | Small molecule | 1 | LDL cholesterol   low density lipoprotein cholesterol measurement   total cholesterol measurement | Mixed hyperlipidaemia when statin is contraindicated or not tolerated   Primary hypercholesterolaemia: lipid lowering therapy adjunct to diet   Reduction of cardiac events in hypercholesterolaemia   Severe hypertriglyceridaemia with or without low HDL cholesterol                                       | rs4253772            | 24097068                   | 12050        | 1  | 7   | 2  |
| CASR  | Cinacalcet Hcl | Small molecule | 1 | calcium measurement                                                                               | Homoeopathic   Hypercalcaemia due to malignant disease   Hypercalcaemia in primary HPT when parathyroidectomy contraindicated   Secondary hyperparathyroidism in end stage renal disease: treatment                                                                                                           | rs17251221 rs1801725 | 20661308 20705733 24068962 | 1585 - 12095 | 1  | 5   | 1  |
| IL6R  | Tocilizumab    | Antibody       | 1 | rheumatoid arthritis                                                                              | Active juvenile idiopathic arthritis (unresp to NSAIDs) in comb with MTX   Active juvenile idiopathic arthritis when inadequate response to NSAIDs   Rheumatoid arthritis (unresp to DMARD/TNF inhib.) in comb with methotrexate   Rheumatoid arthritis when inadequate response to DMARDs incl. methotrexate | rs2228145            | 24390342                   | 14956        | 1  | 1   | 1  |
| TNF   | Adalimumab     | Antibody       | 1 | rheumatoid arthritis                                                                              | Active polyarticular juvenile chronic arthritis-inadequate response to MTX   Active progressive rheumatoid arthritis   Moderate to severe plaque psoriasis: when other treatment is inappropriate   Moderate/severe ulcerative colitis: when other treatment is                                               | rs2596565            | 24532677                   | 190015       | 24 | 145 | 27 |

|        |             |                |   |                           |                                                                                                                                                                                                                                                                                                                                  |                 |                                                 |             |   |   |   |
|--------|-------------|----------------|---|---------------------------|----------------------------------------------------------------------------------------------------------------------------------------------------------------------------------------------------------------------------------------------------------------------------------------------------------------------------------|-----------------|-------------------------------------------------|-------------|---|---|---|
|        |             |                |   |                           | inappropriate   Rheumatoid arthritis when inadequate response to DMARDs incl. methotrexate   Severe active rheumatoid arthritis   Severe ankylosing spondylitis in adults if conventional therapy inadequate   Treatment of active & progressive psoriatic arthritis when DMARD inadequate   Treatment of active Crohn's disease |                 |                                                 |             |   |   |   |
| ABCC8  | Glimepiride | Small molecule | 1 | type II diabetes mellitus | Type 2 diabetes (NIDDM) not controlled by diet,weight loss & exercise alone                                                                                                                                                                                                                                                      | rs5219          | 19056611                                        | 4860 - 5802 | 3 | 5 | 3 |
| ABCC8  | Glipizide   | Small molecule | 1 | type II diabetes mellitus | Non insulin dependent diabetes mellitus when diet has failed                                                                                                                                                                                                                                                                     | rs5219          | 19056611                                        | 4860 - 5802 | 3 | 5 | 3 |
| ABCC8  | Glyburide   | Small molecule | 1 | type II diabetes mellitus | Type 2 diabetes (NIDDM) not controlled by diet,weight loss & exercise alone                                                                                                                                                                                                                                                      | rs5215   rs5219 | 17463248 <br>17463249 <br>19056611 <br>24509480 | 4860 - 5802 | 3 | 5 | 3 |
| ABCC8  | Nateglinide | Small molecule | 1 | type II diabetes mellitus | Control of type-2 diabetes (NIDDM) with metformin if metformin inadequate                                                                                                                                                                                                                                                        | rs5219          | 19056611                                        | 4860 - 5802 | 3 | 5 | 3 |
| ABCC8  | Repaglinide | Small molecule | 1 | type II diabetes mellitus | Control of type-2 diabetes (NIDDM) with metformin if metformin inadequate   Type 2 diabetes (NIDDM) not controlled by diet,weight loss & exercise alone                                                                                                                                                                          | rs5219          | 19056611                                        | 4860 - 5802 | 3 | 5 | 3 |
| KCNJ11 | Glimepiride | Small molecule | 1 | type II diabetes mellitus | Type 2 diabetes (NIDDM) not controlled by diet,weight loss & exercise alone                                                                                                                                                                                                                                                      | rs5219          | 19056611                                        | 1224 - 1306 | 1 | 5 | 3 |
| KCNJ11 | Glipizide   | Small molecule | 1 | type II diabetes mellitus | Non insulin dependent diabetes mellitus when diet has failed                                                                                                                                                                                                                                                                     | rs5219          | 19056611                                        | 1224 - 1306 | 1 | 5 | 3 |
| KCNJ11 | Glyburide   | Small molecule | 1 | type II diabetes mellitus | Type 2 diabetes (NIDDM) not controlled by diet,weight loss & exercise alone                                                                                                                                                                                                                                                      | rs5215   rs5219 | 17463248 <br>17463249 <br>19056611 <br>24509480 | 1224 - 1306 | 1 | 5 | 3 |
| KCNJ11 | Nateglinide | Small molecule | 1 | type II diabetes mellitus | Control of type-2 diabetes (NIDDM) with metformin if metformin inadequate                                                                                                                                                                                                                                                        | rs5219          | 19056611                                        | 1224 - 1306 | 1 | 5 | 3 |

|          |                  |                |   |                                                                             |                                                                                                                                                                                                                                                                |                        |                                |                |      |       |       |
|----------|------------------|----------------|---|-----------------------------------------------------------------------------|----------------------------------------------------------------------------------------------------------------------------------------------------------------------------------------------------------------------------------------------------------------|------------------------|--------------------------------|----------------|------|-------|-------|
| KCNJ11   | Repaglinide      | Small molecule | 1 | type II diabetes mellitus                                                   | Control of type-2 diabetes (NIDDM) with metformin if metformin inadequate   Type 2 diabetes (NIDDM) not controlled by diet, weight loss & exercise alone                                                                                                       | rs5219                 | 19056611                       | 1224 - 1306    | 1    | 5     | 3     |
| PPARG    | Pioglitazone Hcl | Small molecule | 1 | type II diabetes mellitus                                                   | Combination treatment of Type 2 diabetes with insulin   Control of type-2 diabetes if metformin+sulphonylurea therapy is inadequate   Monotherapy for type2 diabetes if overweight and metformin inappropriate   Oral combination treatment of type 2 diabetes | rs1801282              | 24509480                       | 64258          | 1    | 1     | 1     |
| SCN1A    | Oxcarbazepine    | Small molecule | 1 | Mesial temporal lobe epilepsy with hippocampal sclerosis   febrile seizures | Epilepsy - combination of both partial and tonic-clonic seizures   Epilepsy - partial seizures                                                                                                                                                                 | rs7587026              | 24014518                       | 5773 - 52194   | 1    | 3     | 1     |
| GRIN3B   | Memantine Hcl    | Small molecule | 1 | Alzheimer's disease                                                         | Moderate to severe Alzheimer's disease   No information available                                                                                                                                                                                              | rs115550680            | 23571587                       | 40689          | 8    | 8     | 2     |
| SLC22A12 | Sulfinpyrazone   | Small molecule | 1 | urate measurement                                                           | Gout (prophylaxis)   Gouty arthritis   Hyperuricaemia                                                                                                                                                                                                          | rs2078267   rs478607   | 20884846   23263486            | 23999 - 108243 | 2 -3 | 2 -3  | 2     |
| SLC22A11 | Probenecid       | Small molecule | 1 | urate measurement   uric acid measurement                                   |                                                                                                                                                                                                                                                                | rs17300741   rs2078267 | 19503597   20884846   23263486 | 6233 - 8364    | 1    | 1 - 2 | 1 - 2 |
| PDE4D    | Roflumilast      | Small molecule | 2 | asthma                                                                      | Chronic obstructive pulmonary disease                                                                                                                                                                                                                          | rs1588265              | 19426955                       | 448153         | 1    | 2     | 1     |
| SCN2A    | Carbamazepine    | Small molecule | 2 | febrile seizures                                                            | Epilepsy - grand mal   Epilepsy - partial seizures   Epilepsy - tonic-clonic seizures   Prophylaxis of manic-depressive illness unresponsive to lithium   Trigeminal neuralgia                                                                                 | rs3769955              | 25344690                       | 14186          | 1    | 1     | 1     |
| FSHR     | Menotropins      | Unknown        | 2 | polycystic ovary syndrome                                                   | Anovulation unresponsive to clomifene citrate   Ovarian stimulation before in vitro fertilisation   Stimulation of spermatogenesis with concomitant hCG therapy in hypogonadism                                                                                | rs2268361              | 22885925                       | 12316          | 1    | 1     | 1     |

|       |                           |                |   |                                   |                                                                                                                                                                                                                                                                                                                                                                                         |                       |          |             |        |   |   |
|-------|---------------------------|----------------|---|-----------------------------------|-----------------------------------------------------------------------------------------------------------------------------------------------------------------------------------------------------------------------------------------------------------------------------------------------------------------------------------------------------------------------------------------|-----------------------|----------|-------------|--------|---|---|
| PLG   | Alteplase                 | Enzyme         | 3 | plasma plasminogen measurement    | Acute ischaemic stroke: fibrinolytic treatment   Thrombolysis in acute myocardial infarction   Thrombolysis of occluded central venous access devices   Thrombolytic treatment in acute massive pulmonary embolism                                                                                                                                                                      | rs4252129             | 25208887 | 21442       | 1      | 1 | 1 |
| DIO1  | Propylthiouracil          | Small molecule | 3 | thyroxine   thyroxine measurement | Hyperthyroidism   Thyrotoxic crisis   Unlicensed product                                                                                                                                                                                                                                                                                                                                | rs2235544             | 23408906 | 1189        | 1      | 4 | 1 |
| PDE4D | Dipyridamole              | Small molecule | 4 | asthma                            | Alternative to exercise stress in thallium-201 myocardial imaging   Ischemic stroke: Secondary prevention (with/without aspirin)   Secondary prevention of ischaemic stroke   Secondary prevention of transient ischaemic attacks   Thromboembolism+prosthetic heart valve: prophylaxis (+oral anticoagulant)   Transient ischemic attacks: Secondary prevention (with/without aspirin) | rs1588265             | 19426955 | 448153      | 1      | 2 | 1 |
| ACHE  | Rivastigmine              | Small molecule | 4 | resting heart rate                | Mild - moderate dementia in Alzheimer's disease   Mild - moderate dementia in idiopathic Parkinson's disease                                                                                                                                                                                                                                                                            | rs12666989   rs314370 | 20639392 | 861 - 34407 | 3 - 7  | 9 | 4 |
| ACHE  | Neostigmine Methylsulfate | Small molecule | 4 | heart rate                        | Myasthenia gravis   Paralytic ileus   Paroxysmal supra-ventricular tachyarrhythmias   Post operative distention   Post operative urinary retention   Reversal of residual competitive neuromuscular block   Unlicensed product                                                                                                                                                          | rs13245899            | 23583979 | 861 - 34407 | 1 - 71 | 9 | 4 |
| CHRM2 | Tolterodine Tartrate      | Small molecule | 4 | heart rate                        | Symptomatic treatment of urinary urgency, frequency or urge incontinence                                                                                                                                                                                                                                                                                                                | rs2350782             | 23583979 | 62368       | 1      | 3 | 1 |

**Table S3.** Illustrative examples of mapping SNPs curated in the GWAS catalog to LD intervals containing targets of licensed and clinically used drugs. The genes encoding the drug targets are listed using Human Genome Nomenclature Catalogue designation. Drug names and indications are from First Data bank. GWAS SNPs are listed according to Refseq number, and physical distances are in base pairs (bp). Curation code refers to the correspondence between the treatment indication and

GWAS disease or trait association. Some examples show treatment indication rediscoveries (curation codes 1 and 2). For many of these, the drug target gene is the sole occupant of the LD interval defined by the GWAS SNP. Examples come from a variety of disease areas and, for some diseases (such as type 2 diabetes and rheumatoid arthritis), multiple target rediscoveries are noted. Examples of rediscoveries of mechanism of action (curation code 3) and mechanism-based side effects (curation code 4) are also seen.

| <b>Group</b>             | <b>N</b> | <b>SNP/gene distance (bp)</b> | <b>SNP/gene distance (rank)</b> | <b>LD region length (bp)</b> | <b># genes in LD region</b> | <b># druggable genes in LD region</b> |
|--------------------------|----------|-------------------------------|---------------------------------|------------------------------|-----------------------------|---------------------------------------|
| <b>Unassigned - 0</b>    | 1348     | 29020 [9531-62570]            | 1 [1-3]                         | 79320 [39740-217100]         | 2 [1-9]                     | 1 [1-3]                               |
| <b>Concordant 1-4,34</b> | 2100     | 29020 [9489-39160]            | 1 [1-1]                         | 50260 [26440-75500]          | 1 [1-2]                     | 1 [1-1]                               |
| <b>Discordant 5-6</b>    | 1523     | 72620 [22650-178900]          | 3 [1-7]                         | 137900 [63490-5e+05]         | 5 [2-17]                    | 1 [1-4]                               |
| <b>Mixed 54</b>          | 582      | 39260 [10760-52190]           | 1 [1-2]                         | 116800 [59720-229300]        | 3 [1-4]                     | 1 [1-2]                               |
| <b>Remaining 7-9</b>     | 797      | 18260 [8416-86080]            | 1 [1-6]                         | 128700 [23860-320700]        | 5 [2-16]                    | 2 [1-5]                               |

**Table S4.** Summary of the physical properties of LD regions. The properties were stratified by the manually curated concordance/discordance group to which compounds targeting the druggable genes within them are assigned.
